1 **DAMAGE REPAIR VERSUS AGING IN BIOFILMS**

2 Running title: Damage repair versus aging in biofilms

3 Robyn J. Wright,<sup>a,b,c#</sup> Robert J. Clegg,<sup>b,d</sup> Timothy L. R. Coker,<sup>b,e</sup> Jan-Ulrich Kreft<sup>b</sup>

4 <sup>a</sup> School of Life Sciences, University of Warwick, Coventry, UK

5 <sup>b</sup> School of Biosciences & Institute of Microbiology and Infection (IMI) & Centre for Computational  
6 Biology (CCB), University of Birmingham, Birmingham, UK

7 <sup>c</sup> School for Resource and Environmental Studies, Dalhousie University, Halifax, Nova Scotia, Canada

8 <sup>d</sup> Tessella, 26 The Quadrant, Abingdon, Oxfordshire, UK

9 <sup>e</sup> Cancer Research UK, 2 Redman Place, London E20 1JQ

10 # Address correspondence to Robyn J. Wright, [robyn.wright@dal.ca](mailto:robyn.wright@dal.ca); [robyn-wright@hotmail.com](mailto:robyn-wright@hotmail.com).

11

12 **Word counts**

13 Abstract: 250

14 Importance: 146

15 Main text: 5456

16

17 **ORCID**

18 RW: 0000-0003-0562-2610

19 RC: 0000-0001-7041-9745

20 TC: 0000-0002-2516-0639

21 JUK: 0000-0002-2351-224X

22 **Author contributions**

23 JUK and RJC initially designed the study with later input from RJW and TLRC. All simulations  
24 and analyses shown were carried out by RJW with guidance from RJC and JUK. TLRC performed  
25 preliminary simulation experiments to choose many of the simulation parameters. RJW and  
26 JUK wrote the first draft of the manuscript and all authors contributed to revisions. The  
27 authors declare no conflicts of interest.

28

29 **Acknowledgements**

30 RJW and TLRC were supported by BBSRC, UK; RW *via* a Midlands Integrative Biosciences  
31 Training Partnership PhD scholarship and TLRC *via* a University of Warwick Systems Biology  
32 Doctoral Training Centre PhD scholarship. RJC and JUK are grateful to the UK National Centre  
33 for the Replacement, Refinement & Reduction of Animals in Research (NC3Rs) for funding  
34 their development of individual-based models (IBMs) for the gut environment (eGUT grant  
35 NC/K000683/1). The funders had no role in study design, data collection and interpretation,  
36 or the decision to submit the work for publication.

37

38 **ABSTRACT**

39 The extent of senescence due to damage accumulation (or aging) is evidently evolvable as it  
40 varies hugely between species and is not universal, suggesting that its fitness advantages  
41 depend on life history and environment. In contrast, repair of damage is present in all  
42 organisms studied. Repair and segregation of damage have not always been considered as  
43 alternatives, despite the fundamental trade-off between investing resources into repair or  
44 growth. For unicellular organisms, unrepaired damage could be divided asymmetrically  
45 between daughter cells, leading to aging of one and rejuvenation of the other. Repair of  
46 unicells has been shown to be advantageous in well-mixed environments such as chemostats.  
47 However, most microorganisms live in spatially structured systems such as biofilms with  
48 gradients of environmental conditions and cellular physiology as well as clonal population  
49 structure. We asked whether this clonal structure might favor aging by damage segregation  
50 as this can be seen as a division of labor strategy, akin to the germline soma division in  
51 multicellular organisms. We used an individual-based model with a newly developed adaptive  
52 repair strategy where cells respond to their current intracellular damage levels by investing  
53 into repair machinery accordingly. We found that the new adaptive repair strategy was  
54 advantageous whenever efficient and optimal, both in biofilms and chemostats. Thus, biofilms  
55 do not favor a germline soma-like division of labor between daughter cells in terms of damage  
56 segregation. We suggest that damage segregation is only beneficial when active and effective,  
57 extrinsic mortality is high and a degree of multicellularity is present.

58 **IMPORTANCE**

59 Damage is an inevitable consequence of life, leading to a trade-off between allocating  
60 resources into damage repair or into growth whilst allowing aging, *i.e.*, segregation of damage  
61 upon cell division. Few studies considered repair as an alternative to aging. Moreover, all  
62 previous studies merely considered well-mixed environments, although the vast majority of  
63 unicellular organisms live in spatially structured environments, exemplified by biofilms, and  
64 fitness advantages in well-mixed systems often turn into disadvantages in spatially structured  
65 systems. We compared the fitness consequences of aging versus damage repair in biofilms  
66 with an individual-based model implementing an adaptive repair mechanism based on sensing  
67 damage. We found that aging is not beneficial. Instead, it is useful as a stress response to deal  
68 with damage that failed to be repaired when (i) clearly asymmetric cell division is feasible; (ii)  
69 extrinsic mortality is high; and (iii) a degree of multicellularity is present.

70

71 **KEYWORDS**

72 Evolution, division of labor, mathematical modelling, ageing, senescence, trade-offs

73 INTRODUCTION

74 Senescence is all around us, yet it is not obvious why it has evolved in many taxa as it would  
75 appear to be detrimental to the fitness of individuals. Importantly, the extent of senescence,  
76 manifesting in decreasing fecundity and/or increasing mortality with age, is clearly evolvable  
77 as it varies hugely between species and is *not* universal. For example, several taxa of simple  
78 multicellular organisms can fully regenerate and for several taxa of complex multicellular  
79 organisms, fecundity does not simply decrease with age and/or mortality does not simply  
80 increase with age (1–3). An evolutionary explanation for the various extents of senescence  
81 present in different organisms is challenging, particularly for unicellular organisms that divide  
82 apparently symmetrically, such as most prokaryotes and some eukaryotic unicells, in contrast  
83 to multicellular animals with a clear division of labor between germline and soma (4, 5).  
84 However, the first single-cell study of division asymmetry in *Escherichia coli* highlighted that  
85 morphological symmetry does not exclude functional asymmetry as daughter cells inheriting  
86 the old cell pole were shown to grow a little slower than the mother cell while the new cell  
87 pole daughters grew a little faster (6). Ironically, *Caulobacter crescentus*, the bacterium first  
88 studied in terms of aging (7), as it has substantial morphological and functional asymmetry in  
89 cell division, has been shown in more recent high-throughput microfluidic studies to maintain  
90 a constant growth rate over cell divisions under benign conditions (8) and to divide protein  
91 aggregates symmetrically between mother and daughter cells (9).

92  
93 Following the first single-cell studies that suggested the existence of aging in unicellular  
94 prokaryotes (7, 10, 11) and unicellular eukaryotes (12), there has been a gold rush of studies  
95 eager to demonstrate aging in further unicells, such as bacteria (13–15) and eukaryotic algae  
96 (16–19). However, the loss of fecundity (10) or increase of mortality (20) with age,

97 demonstrated in some of these unicells, are rather small effects compared with the resource  
98 limitations of growth and high external mortality in most environments. The effects are also  
99 much smaller than in the budding yeast, which has long been known to have a limited  
100 replicative lifespan (21), supported by several recent high-throughput single-cell studies (22–  
101 28). However, it may be misleading to regard the budding yeast as a unicellular organism as  
102 wild relatives are capable of dimorphic growth (29) and domesticated strains rapidly evolve  
103 multicellularity (30, 31). Crucially, a number of recent experimental results have led to a  
104 reinterpretation of aging, primarily in the sense of segregating protein aggregates, as a stress  
105 response rather than an evolved characteristic of growth under benign conditions (9, 20, 32–  
106 38).

107

108 In concert with the gold rush for experimental evidence for aging, there has also been one of  
109 mathematical modelling studies eager to find evolutionary advantages of aging. Some of these  
110 models did not consider extrinsic mortality (39–41), although it favors rapid and early  
111 reproduction and thus tilts the evolutionary trade-off towards investment of resources into  
112 growth and reproduction, rather than maintenance and repair (1, 42). Some also did not  
113 consider repair as an alternative (40, 41, 43, 44) or did not consider the cost of repair (39).

114

115 Repair is present in all organisms studied and evidence for the evolution of mechanisms that  
116 repair damage, such as misfolded and aggregated proteins (9), is beyond doubt. Of the few  
117 models that consider both extrinsic mortality and costly repair, the model of Ackermann *et al.*  
118 (2007) (45) was the first. It found that asymmetric damage segregation outperformed repair.

119 In contrast, our previous study, Clegg *et al.* (2014) (46), found that repair was always  
120 beneficial, while damage segregation was beneficial only in addition to repair and if three

121 conditions were fulfilled simultaneously: (i) damage is toxic, (ii) damage accumulates at a high  
122 rate and (iii) repair is inefficient. The reason for this discrepancy could be pinned down. In  
123 Ackermann *et al.* (2007) (45), rather than growing, cells divide at fixed time intervals, while in  
124 Clegg *et al.* (2014) (46), cells grow by consuming substrate and divide when they have reached  
125 a threshold size. This enabled both an immediate benefit of repair (increased growth rate of  
126 a less damaged cell leading to earlier division) and an immediate cost of repair (diverting  
127 resources away from growth to repair machinery). Overall, this made repair advantageous.

128

129 More recent models that also consider repair have come to similar conclusions (36, 47, 48).  
130 Vedel *et al.* (2016) (36), in particular, has advanced our understanding with an experimentally  
131 validated model that considers the fitness of the whole lineage. This helped to identify a  
132 positive feedback loop, shifting growing lineages towards less damaged cells and explaining  
133 how higher stress levels lead to higher damage accumulation which in turn leads to higher  
134 damage segregation.

135

136 None of these studies considered the fitness effects of aging and repair in spatially structured  
137 environments such as biofilms, although biofilms are prevalent in nature and important for  
138 ecosystem function. For humans, they have many advantages in biotechnology but also cause  
139 big problems in industry and health. Biofilms are heterogeneous in both time and space (49)  
140 and cells that are growing within them are therefore exposed to varying, and often limiting,  
141 nutrient regimes (50). This leads to gradients in growth rate and the presence of an active  
142 layer in biofilms, where active growth only occurs close to the boundary of the biofilm, due to  
143 slow nutrient diffusion (51). Growth within biofilms has also been shown to confer tolerance  
144 to damage-inducing agents, such as antibiotics (49, 52–54) and UV radiation (55, 56), and it is

145 therefore likely that these gradients of growth rate and stress could make the evolutionary  
146 benefits of aging and repair different from spatially uniform environments, such as  
147 chemostats. Moreover, biofilms have a clonal population structure unless the cells remain  
148 motile (57–59). This can have strong effects on the evolution of division of labor (60). Damage  
149 segregation can be seen as a division of labor akin to the germline soma differentiation in  
150 multicellular animals (61). Thus, we hypothesized that biofilms might favor damage  
151 segregation over repair.

152

153 To test this hypothesis, we developed a new individual-based model with adaptive repair,  
154 whereby cells were able to sense and respond to their current intracellular damage levels.  
155 This enables an appropriate response to gradients of stress and damage in biofilms. We found  
156 that adaptive repair rather than damage segregation or a fixed rate of repair was the optimal  
157 strategy for unicells growing in a biofilm, but only when the rate of damage accumulation was  
158 proportional to the cells' specific growth rate.



159 RESULTS

160 **Characteristics of adaptive repair.** We developed a new repair strategy where allocation of  
161 newly synthesized protein into repair machinery, denoted by  $\hat{\beta}$ , rather than growth  
162 machinery, depends on the current level of damage in the cell and compared this with  
163 previous strategies (Fig. 1). The idea was that the cell can sense and appropriately respond to  
164 its damage level. This adaptive repair is more appropriate than a fixed repair strategy when  
165 rates of growth and damage accumulation vary in time or space, *e.g.* in fluctuating or spatially  
166 structured environments, such as biofilms. Adaptive repair is therefore meant to replace the  
167 previous strategy of a fixed allocation into repair machinery at an optimal level,  $\beta$ , which is  
168 appropriate for constant or chemostat environments, where growth and damage  
169 accumulation rates are in a steady state, like in our previous study, Clegg *et al.* (2014) (46).  
170 There, we estimated the optimal, fixed investment into repair (here simply referred to as fixed  
171 repair) by examining the mean specific growth rates of cells with different investments into  
172 repair and found that for a damage accumulation rate of  $0.1 \text{ h}^{-1}$ , an investment into repair of  
173  $\beta = 0.07$  was optimal for both asymmetric and symmetric strategies (for the case where  
174 damage is toxic, that we focus on here). The purpose of this section is to examine the  
175 consequences of the new adaptive repair strategy and to test whether it is equivalent to the  
176 previous optimal repair strategy in steady state environments.

177

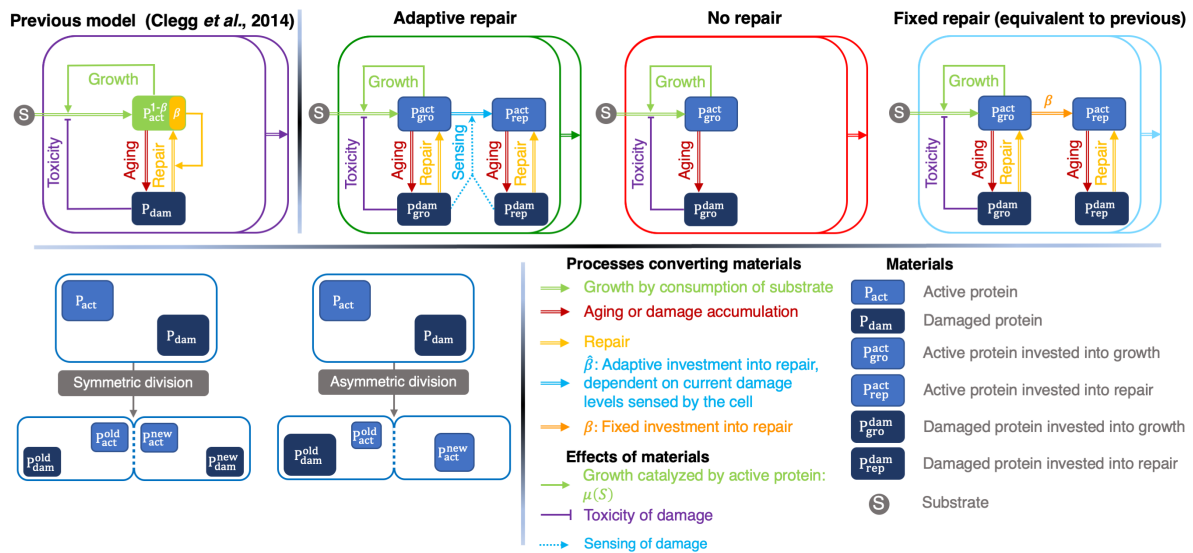

FIG 1 General schematic of division and repair strategies used in this study, giving rise to 6 combinations: (i) symmetric division with no repair (NR) (ii) symmetric division with fixed repair (FR); (iii) symmetric division with adaptive repair (AR); (iv) asymmetric division (damage segregation) without repair (DS); (v) asymmetric division with fixed repair (DSFR); and (vi) asymmetric division with adaptive repair (DSAR).

178

179 **Consequences of adaptive repair on the fraction of repair protein in single cells.** The adaptive

180 repair strategy leads to an allocation into repair that responds to current levels of damage and

181 therefore lags behind the ideal level of repair machinery, unless damage levels reach a steady

182 state due to symmetric division (Fig. S1). Since asymmetric division causes sudden changes in

183 damage levels, the current investment into repair tracks the changing damage levels (Fig. 2A).

184 Damage levels then change as a result of repair, which in turn changes allocation into repair.

185 As a result, the level of repair machinery never reaches ideal levels in asymmetrically dividing

186 cells, in contrast to symmetrically dividing cells (Fig. 2A and S1). To approach ideal levels of

187 repair machinery more quickly, a high turnover of repair protein would be required. Since

188 cellular proteins that are not involved in regulation have a long half-life of more than one

189 generation (62), it seems more realistic to assume that repair protein does not turn over;

190 turnover would also be costly and unnecessary. Investment into repair varies greatly over the

191 cell cycle for cells with asymmetric segregation of damage but is always at approximately the

192 same level immediately before division. The investment into repair immediately before

193 division is approximately the same as the fixed optimal investment into repair.

194

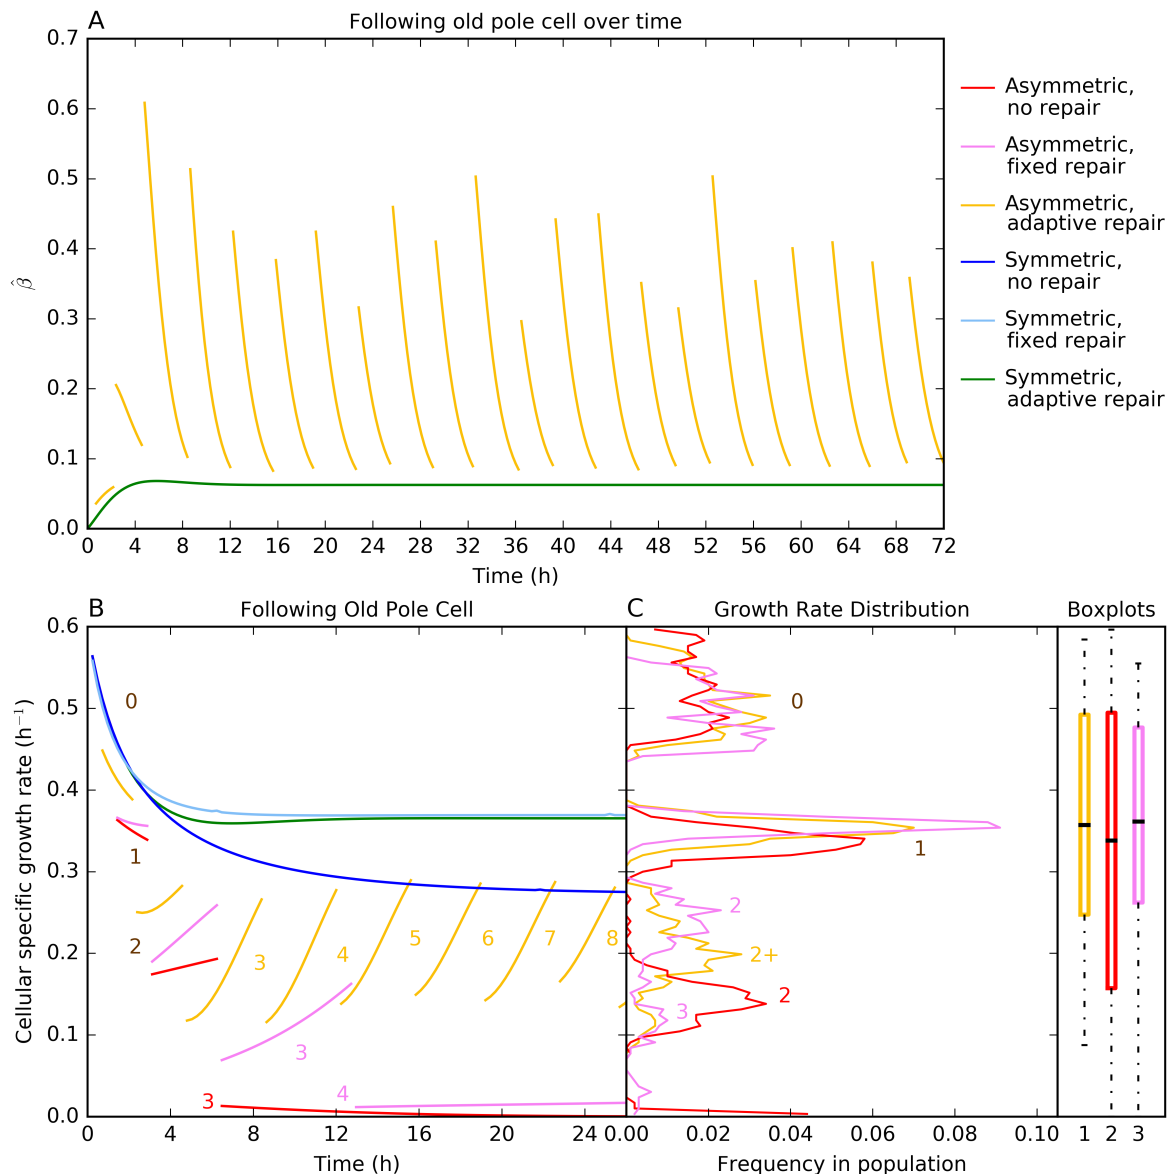

FIG 2 Characteristics of strategies in a constant environment (no competition). **(A)** Investment into repair ( $\hat{\beta}$  on the y axis) for the new adaptive repair strategy following the old pole cell over many divisions. In asymmetric divisions, the old pole cell inherits all damage, leading to a jump in allocation into repair following division and then decreasing steadily until the next division. In symmetric divisions, damage, and therefore investment into repair, reaches a steady state. **(B)** Specific growth rate of a single cell over consecutive cell divisions. Numbers in the panel label generations and each generation is shown with a new line (for asymmetric strategies). The specific growth rate of an asymmetrically dividing cell with no repair (red,  $\beta = 0$ ) drops quickly to zero. For a cell with fixed optimal repair (magenta,  $\beta = 0.07$ ), it decreases more slowly over time but also reaches zero. For a cell

with adaptive repair (yellow,  $\hat{\beta}$  variable), it decreases only initially towards a see saw pattern, as in (A). Specific growth rates do not change at division for symmetric strategies (blue, cyan, and green) and there is no difference between daughter cells. Symmetric strategies show an initial decrease in specific growth rate before reaching a steady state, with similar values for fixed and adaptive repair and lower without repair. **(C)** Distribution of specific growth rates in populations at steady state (snapshot taken at 100 days) for asymmetrically dividing cells. Specific growth rates of cells with adaptive repair are between those with fixed repair and those without repair. The medians and inter-quartile ranges for adaptive and fixed repair are close and higher than for symmetrically dividing cells. Data are reproduced with permission from Fig. 4A,B in (46), with the new adaptive repair strategy added. Specific growth rate was  $0.6 \text{ h}^{-1}$  and aging rate was 0.22 and dependent upon specific growth rate for all strategies. Replicate simulations are similar, see Fig. S2.

195

196 **Consequences of adaptive repair on growth rates of individual cells.** For asymmetric  
197 strategies, cells with adaptive repair maintained the highest specific growth rate across  
198 consecutive divisions from approximately generation three onwards (Fig. 2B). Without any  
199 repair, specific growth rate declined rapidly towards zero. With fixed repair, specific growth  
200 rates likewise declined towards zero, albeit more slowly. For symmetric strategies, specific  
201 growth rates were similar for all strategies while damage levels were low. Later, cells with  
202 repair maintained substantially higher specific growth rates than cells without repair (Fig. 2B).

203

204 **Consequences of adaptive repair on the population level.** A comparison of age and total  
205 biomass for each cell in a population shows the distribution of the levels of damage and how  
206 close the cells are to division (division is triggered when cells reach total biomass threshold;  
207 Fig. S3). For asymmetric strategies, adaptive repairers did not reach the high damage levels  
208 (old ages) of other strategies. For symmetric strategies, adaptive repairers were marginally  
209 older than fixed repairers, but much younger than cells without repair. Growth rates in  
210 populations of asymmetrically dividing cells had a multimodal distribution with marked  
211 differences between generations (Fig. 2C). There were fewer cells with very high and very low  
212 specific growth rates in populations using either fixed or adaptive repair. The growth rate

213 distribution of the new adaptive repair strategy was in between the fixed and no repair  
214 strategies. The medians for each population confirm that the population specific growth rates  
215 were highest for cells using the fixed repair strategy, though the adaptive repair strategy was  
216 only slightly lower and showed less variation between cells (Fig. 2C). Symmetrically dividing  
217 cells all had the same specific growth rate as the single cells in Fig. 2B with the fixed repairers  
218 having a slight specific growth rate advantage again. In summary, the new adaptive repair  
219 strategy led to growth rates that were very similar to fixed repair at the population level, but  
220 on the individual level, there were fewer old cells.

221

222 **Competitions of aging strategies in constant and chemostat environments.** Competitions are

223 unambiguous and unbiased ways to measure fitness holistically. In the constant environment,

224 cells were removed at random, which modelled extrinsic mortality, and the strategy that was

225 left at the end had won. In the chemostat environment, cells were likewise removed

226 randomly, but they also competed for the substrate that entered the environment with a

227 given rate. This means that lineages that produced fewer offspring per time at the current

228 concentration of substrate were washed out. In other words, cells with the highest specific

229 growth rate (as dependent on substrate concentration) will emerge as the winner (on average,

230 as removal is stochastic). The damage segregation without repair strategy (DS) quickly lost

231 against either repair strategies (FR and AR) in both environments (Fig. 3). The winner took

232 much longer to emerge between the two repair strategies and there were large fluctuations

233 in the biomass ratios over the course of the simulations. In the constant environment, fixed

234 repairers (FR) had an advantage, whereas in the chemostat, the adaptive repairers (AR) won

235 in the end. Hence, the new adaptive repair strategy was slightly fitter than the fixed repair

236 strategy in those natural environments that are better approximated by chemostats than

237 constant environments, such as systems that are mixed on a reasonably short time scale and  
238 that receive resource inputs and experience removal of biomass by various means. However,  
239 more environments are spatially structured and are therefore better modelled by biofilms, so  
240 we turn to these in the next section.

241

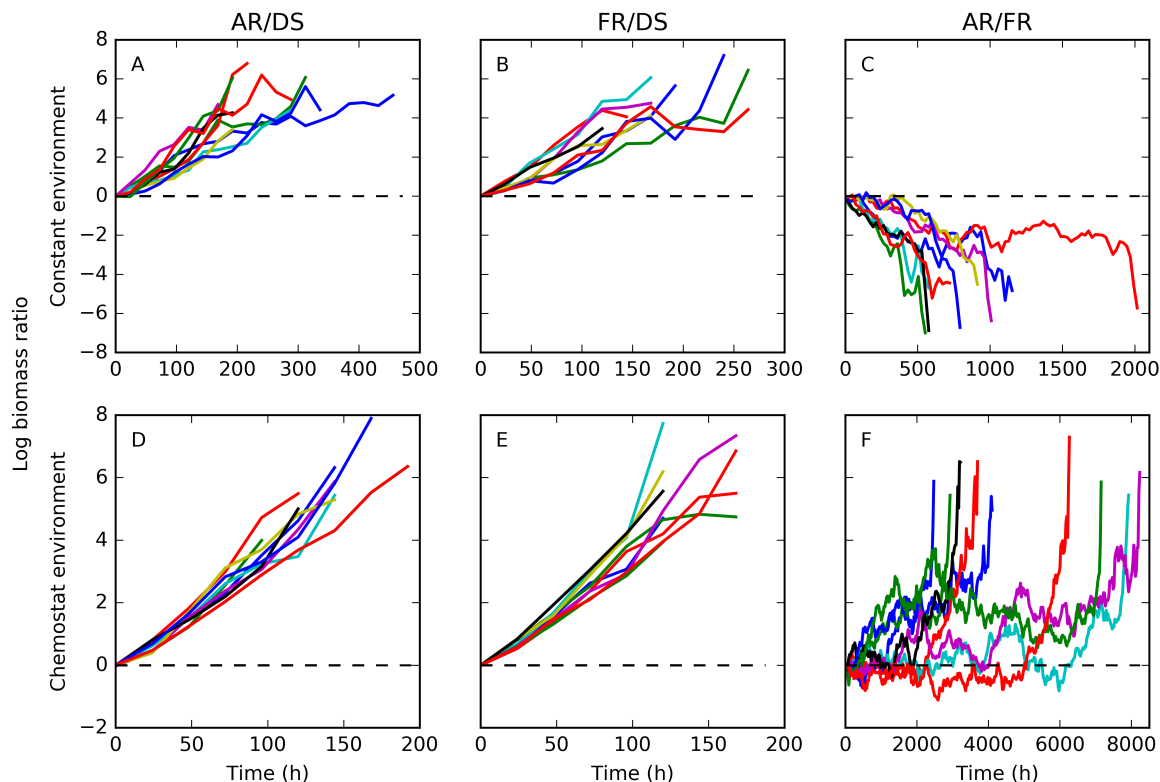

FIG 3 Pairwise competitions of aging strategies in constant and chemostat environments: Adaptive Repair without damage segregation (AR), Fixed optimal Repair without damage segregation (FR), Damage Segregation without repair (DS). Both repair strategies were substantially fitter than DS in either environment (A,B,D,E;  $n=10$ ; proportion test,  $p=0.00195$  for all). The two repair strategies were closer in fitness, as seen in Fig. 2B, and it took more than an order of magnitude longer before the final outcome was clear. FR was slightly fitter than AR in the constant environment (C;  $n=10$ ; proportion test,  $p=0.00195$ ), as expected from Fig. 2B, but not in the chemostat environment (F;  $n=10$ ; proportion test,  $p=0.00195$ ). Maximum specific growth rate was  $0.6 \text{ h}^{-1}$ , and aging rate was  $0.22 \text{ h}^{-1}$  and dependent upon specific growth rate for all strategies.

242

243 **Generating realistic biofilm structures in the absence of damage accumulation.** We first  
244 identified which parameter set would give rise to typical, rough biofilm structures with ‘finger’  
245 formation (63–65), rather than flat biofilms, so that we could then study aging in biofilms using

246 realistic biofilm structures (Fig. S4 and File S1). These simulations were without aging or repair.  
247 The substrate concentration in the bulk liquid was varied in order to change the dimensionless  
248 group  $\delta^2$  that quantifies the extent to which biofilm growth is intrinsically limited (growth-  
249 limited regime, high  $\delta^2$ ) or limited extrinsically by diffusional mass transport into the biofilm  
250 (transport-limited regime, low  $\delta^2$ ; see Supplementary Materials and Methods for more  
251 information on  $\delta^2$ ). Since biofilm roughness at the end of the simulations was not significantly  
252 different between the three  $\delta^2$  regimes tested, we decided to continue our simulations with  
253 only one value for  $\delta^2$ ; the intermediate value where  $\delta^2 = 0.0069$ .

254

255 **Biofilm simulations with constant damage accumulation rate.** For the biofilm simulations  
256 with constant damage accumulation rate, we compared the asymmetric damage segregation  
257 without repair (DS) and symmetric damage segregation with adaptive (AR) or fixed (FR) repair.

258

259 Repair of damaged material is assumed to require resources, *e.g.*, energy and some new  
260 material to replace the damaged parts of the old material. These resources are assumed to be  
261 supplied by endogenous metabolism of cellular material rather than the substrate, as the  
262 latter is not always available. As a result, converting damaged material into undamaged, active  
263 material comes at a loss of biomass (we assume a loss of 20% for reasons given in Clegg *et al.*  
264 (2014) (46)). This loss leads to shrinking of cells (since the density of cells is assumed to be  
265 constant), unless cells grow sufficiently fast to compensate, which is not the case in the lower  
266 layers of a biofilm. Shrinking does not affect fitness in constant and chemostat environments  
267 as only the numbers of organisms matters, but the shrinking of cells of the adaptive repair  
268 strategy had profound effects on biofilm structure and reduced the fitness of this strategy in  
269 biofilms (Fig. 4). In these competitions, the winner depended upon the initial cell density.

270 When the initial cell density was low, it appears that the winner depends more upon the initial,  
271 random placement; cells of any strategy that happen to be placed furthest away from the  
272 other strategies tend to win. When the initial cell density is higher, the winner is more  
273 dependent upon the fitness of that strategy. Because cells of the adaptive repair strategy  
274 shrink so much more than the other strategies, this effect is much greater for them.  
275

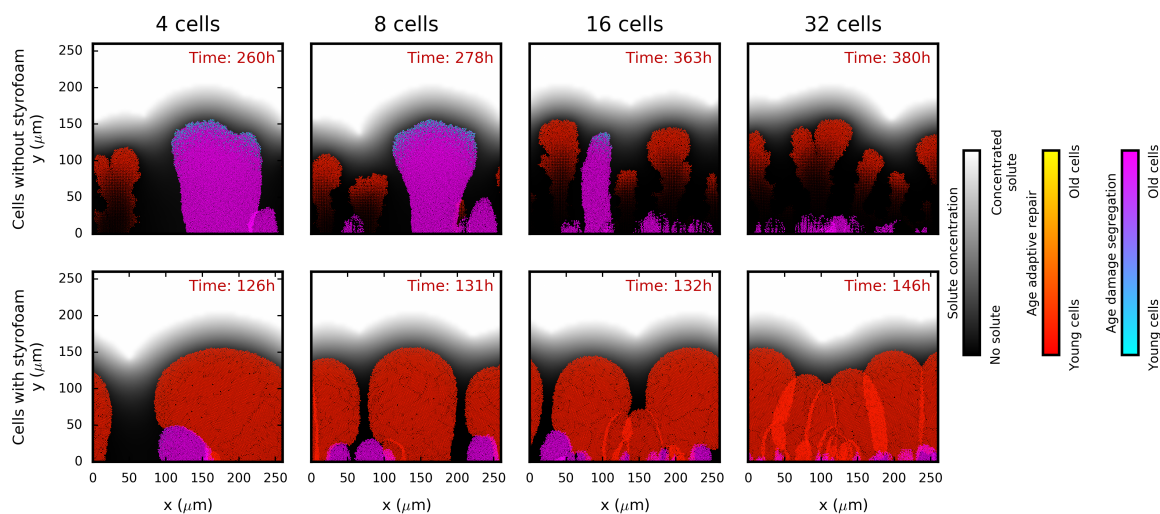

FIG 4 Damage segregation (DS, cold colors) *versus* adaptive repair (AR, warm colors) strategies in biofilms. Adaptive repairers are strongly affected by shrinking (top row) as they are much fitter when assumed not to shrink, *i.e.*, when the material lost due to repair is replaced with inert and massless material of the same volume ('styrofoam', bottom row). Initial cell density increases from left to right (4, 8, 16 or 32 cells). Biofilm structures shown have all reached a height of 154  $\mu\text{m}$ . Cells are colored by age with different color gradients for each species. Maximum specific growth rate was  $1.2 \text{ h}^{-1}$  and damage accumulation rate was  $0.1 \text{ h}^{-1}$  (not proportional to specific growth rate) for all. Results of replicate simulations, simulations which competed DS and AR against the fixed optimal repair strategy (FR) and controls are shown in File S1. See Fig. S5 for time courses of log biomass ratios. For simulations without styrofoam, DS tended to be fitter than AR at initial densities of 4 and 8 cells, but AR was fitter at the higher initial densities of 16 and 32 cells (top row). For competitions between DS and FR, FR was fitter at densities of 8, 16 or 32 cells (File S1 and Fig. S5). In the simulations with 'styrofoam', AR and FR were always fitter than DS (bottom row; File S1 and Fig. S5). For competitions between AR and FR, FR was fitter in simulations without 'styrofoam', while AR was fitter in simulations with 'styrofoam'. Control simulations that competed two cells of the same strategy always led to no clear winner.

276

277 How much of the disadvantage of adaptive repairers was due to shrinking can be seen by  
278 comparing simulations with shrinking cells to identical simulations where, for the sake of



279 comparison, the lost material is assumed to continue to take up volume (*i.e.*, the lost material  
280 has no mass but keeps its original volume, dubbed 'styrofoam'). In the simulations without  
281 styrofoam, AR was only fitter than DS at initial densities of above 8 cells, FR was fitter than DS  
282 at initial densities above 4 cells and FR was fitter than AR in all simulations. In the simulations  
283 with styrofoam the results were much clearer; AR and FR are fitter than damage segregating  
284 cells and AR was fitter than FR, regardless of the cell density at the beginning of the simulation  
285 (Figs. 4 and S5).

286

287 The results caused by shrinking were thought to be unrealistic. Cells have not been observed  
288 to shrink considerably, unless they have been starved for long periods of time, and biofilm  
289 structures such as in Fig. 4 with a vanishing base due to endogenous metabolism have not, to  
290 our knowledge, been observed, and would be mechanically unstable in the presence of shear  
291 (66). Shrinking must therefore be either very limited in real cells, or the assumption that non-  
292 growing cells accumulate damage at the same rate as rapidly growing cells must be wrong  
293 (which would only cause the non-growing cells to shrink as the growing cells can make up the  
294 lost volume). We decided to avoid this unrealistic shrinking by assuming that cells that do not  
295 grow also do not accumulate damage. The damage accumulation rate was therefore assumed  
296 to be proportional to cellular specific growth rate (and was matched to the previous damage  
297 accumulation rate; Fig. S6), to allow for the very low rates of growth of cells below the active  
298 layer of the biofilm (the active layer is shown in Fig. 5). This means that shrinking is not  
299 abolished, but that slowly growing cells will accumulate damage and shrink at a lower rate as  
300 repair, leading to shrinking, is less necessary. See Materials and Methods for further  
301 explanation of this proportional damage accumulation rate. We therefore continued with a

302 damage accumulation rate of 0.22 that is dependent upon specific growth rate and also  
303 applied this to the earlier constant and chemostat environments.

304

305 AR performed better than FR in the biofilms with styrofoam (Fig. 4), and we therefore focus  
306 on the two main alternative strategies, AR and DS, in the following section.

307

308 **Biofilm simulations where the damage accumulation rate is proportional to specific growth**

309 **rate.** When the damage accumulation rate was proportional to the specific growth rate, AR

310 was more competitive than DS (Figs. 5 and 6; Fig. S7 also shows the controls). The higher the

311 initial cell density, the stronger the advantage of AR and the earlier that they won. At the

312 highest initial cell density (32 cells), AR won in all 50 replicate simulations ( $p=0.00$ ). At the

313 lowest cell density (4 cells), they won in the majority of the simulations (31 vs 19) but this

314 difference was not statistically significant ( $p=0.119$ ). The advantage of adaptive repair became

315 statistically significant at initial cell densities of eight or higher (Table S1).

316

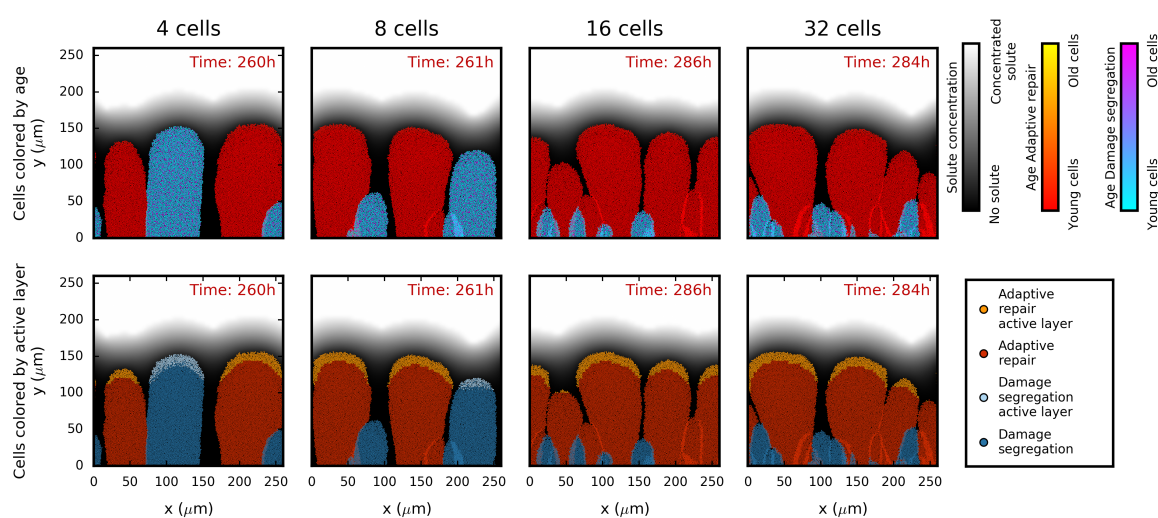

FIG 5 Damage segregation *versus* adaptive repair competitions in biofilms where damage accumulation rate is proportional to specific growth rate. From left to right, initial cell density increases (4, 8, 16 and 32 cells). Adaptive repair becomes more advantageous the

greater the initial cell density. In the top row, cells are colored by age, while in the bottom row, cells are colored brighter if they are in the active layer of rapidly growing cells, defined as cells with a specific growth rate within 5% of the highest at this time point. Biofilm structures shown have all reached a height of 154  $\mu\text{m}$ . Maximum specific growth rate was  $1.2 \text{ h}^{-1}$  and damage accumulation rate was set at  $0.22 \text{ h}^{-1}$ . Repeat simulations are shown in File S1 and control competitions are shown alongside this figure in Fig. S7.

317

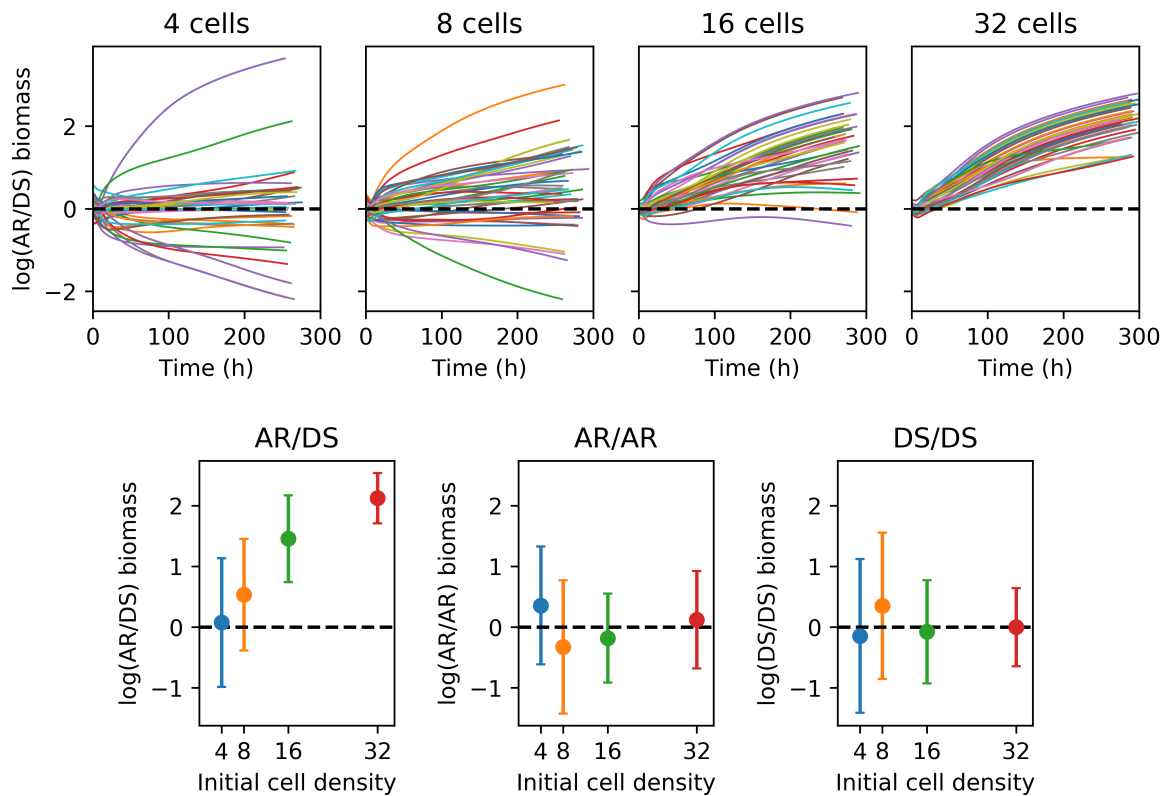

FIG 6 Time courses of log biomass ratios for 50 replicate biofilm competitions between adaptive repair (AR) and damage segregation (DS) strategies and their controls. Adaptive repair (AR) became the more advantageous the higher the initial cell density, compared with damage segregation (DS). At the start, 4, 8, 16 or 32 cells were randomly placed on the surface. Results are shown using log biomass ratios to make the horizontal line at  $\log(\text{ratio}) = 0$  (i.e., ratio = 1) a symmetry axis. The top row shows time courses for AR *versus* DS competitions, while the bottom row shows mean  $\log(\text{ratio})$ 's with standard deviations for all simulations, including controls, taken when biofilms had reached 154  $\mu\text{m}$  (approximately 250 – 300 hours). Statistics for these competitions are shown in Table S1 and biofilm structures are plotted in Fig. 5 and File S1. Control time courses are shown in Fig. S7. Maximum specific growth rate was  $1.2 \text{ h}^{-1}$  and damage accumulation rate was set at  $0.22 \text{ h}^{-1}$  and dependent upon specific growth rate for all strategies.

318

319 We decided to use the log biomass ratios as the best measure of fitness after comparing the

320 performance of a range of different metrics when both strategies were identical (controls in

321 Table S1 and Fig. S7). The ideal fitness measure should not be time-dependent, such that  
322 running simulations longer would not change outcomes. As the trends of the log biomass  
323 ratios in Figs. 6 and S7 show, using biomass at the end of the simulations (approximately 250  
324 h) was appropriate since outcomes would not have changed had the simulations continued.  
325 Moreover, the fitness metric with its significance testing should never result in a statistically  
326 significant result when the two competitors were identical, as was the case with final growth  
327 rate (Table S1). Final growth rate was therefore not a suitable measure. Both biomass and  
328 population size could be used; they are strongly coupled, but the biomass changes are  
329 smoother than the cell numbers, hence, biomass was chosen as the fitness measure.

330

331 The biofilms formed from these equal mixtures of DS and AR, initially placed randomly on the  
332 substratum surface, show the spatial distribution of the strategies and the age and activity of  
333 the cells (Fig. 5 and S7). First, it can be seen that there was limited mixing of cells where  
334 neighboring 'fingers' touch (lines of different color standing out), consistent with our previous  
335 work (67, 68). This is due to the assumption that cells embedded in the biofilm matrix are not  
336 motile. Second, if finger-like cell clusters were similarly separated from other clusters, both  
337 strategies reached a similar height, suggesting that shrinking was negligible (Fig. 5; 4 cell initial  
338 density). This was despite repair leading to loss of material and cellular volume as growth  
339 could compensate for any losses when the rate of damage accumulation was proportional to  
340 growth rate. Third, the effect of increasing the initial cell density can also be seen. When there  
341 were only a few cells randomly placed on the substratum surface, it was likely that one cell  
342 happened to be further away from competing cells than any of the other cells. This lineage  
343 could therefore grow without much competition and became the highest finger producing the  
344 highest biomass, regardless of which strategy it followed. Hence, results at low cell density

345 were more dependent on the random initial cell positions determining the distance to  
346 competitors than on competitiveness. The higher the initial density, the less influenced the  
347 results were by the stochastic initial attachment of cells on the surface. In these cases, AR had  
348 the advantage. Finally, comparing the distribution of young vs old cells with the distribution  
349 of active vs inactive cells (Fig. 5) shows that AR were all young throughout the biofilm, while  
350 DS created a mixture of young (rejuvenated) and old (damage-keeping) cells throughout the  
351 cell clusters, regardless of height. Note that cells are only active when they are at the top of  
352 their biofilm finger and when this finger is at least about as high as the neighboring fingers  
353 because only then do they receive sufficient substrate diffusing in from the bulk liquid, which  
354 is separated from the biofilm by a concentration boundary layer (63–65). Hence, whether a  
355 strategy still had cells in the active layer was determined by whether it still had cells growing  
356 close to the maximum biofilm height, and not by how many cells it had that were very young.

357 DISCUSSION

358 Here, we investigated two alternative strategies for unicells to deal with intracellular damage:  
359 segregation or repair. Due to a trade-off between investing cellular resources into repair  
360 machinery *versus* growth machinery that is fundamental to all living organisms, repair is costly  
361 and therefore not obviously beneficial. This study is the first to compare these strategies in  
362 biofilms, representing spatially structured environments. We began by developing a new  
363 model for adaptive repair of cellular damage, whereby cells are able to sense and respond to  
364 current damage levels by investing into repair machinery accordingly, enabling cells to deal  
365 with spatial and temporal changes of conditions in biofilms. We found that in almost all  
366 conditions tested, adaptive repair was fitter than the asymmetric segregation of damage at  
367 division (Figs. 3 and 6). We also compared adaptive repair with our previous fixed optimal  
368 repair strategy (46) – in well-mixed environments where both strategies are suitable.  
369 Surprisingly, although cells with the adaptive repair mechanism had slightly lower growth  
370 rates than those with fixed optimal repair at the level of the individual (Fig. 2B), they  
371 outperformed them in the chemostat environment where there was competition for  
372 resources (Fig. 3). The likely reason for this is that with adaptive repair, there are more cells  
373 growing at the highest rate (Fig. 2C); as cells grow exponentially, any slight growth rate  
374 advantage will increase over time, resulting in a higher chance of division before stochastic  
375 removal from the chemostat.

376  
377 When we initially applied the adaptive repair model to growth in biofilms we were surprised  
378 that the bases of biofilm ‘fingers’ of adaptive repairers were disappearing (Fig. 4). Since we  
379 assume that converting damaged into new material incurs a loss of 20% to account for the  
380 energy requirement of repair, the slowly growing cells at the base of the biofilm are not able

381 to compensate for this 20% loss of biomass due to repair with new growth. Therefore,  
382 repairers shrink. This could be considered a biofilm specific disadvantage of repair. However,  
383 we think such extensive shrinking is unrealistic. First, to our knowledge, extensive shrinking of  
384 the volume of starving or dormant cells other than by cell division has not been observed and  
385 this may be due to the murein sacculus maintaining cell shape. Second, these biofilm  
386 structures with completely disappearing bases are not realistic as the slightest shear stress  
387 would detach these structures (66, 69, 70). Moreover, one would expect that the higher the  
388 rate of metabolism such as protein folding or respiratory electron transport, the higher the  
389 chance of damage arising such as protein misfolding or damage by reactive oxygen species  
390 (19, 71, 72). Indeed, organisms that grow more rapidly have been shown to also accumulate  
391 damage more rapidly (47, 73) and can have a higher rate of mortality (38). Therefore, we  
392 decided to make the simplest assumption that the rate of damage accumulation should be  
393 proportional to the specific growth rate of individual cells. In this case, biofilm fingers of  
394 adaptive repairers no longer had shrinking bases (Fig. 5) and now performed better than the  
395 damage segregators (Fig. 6 and Table S1), as may be expected when cell death is  
396 predominantly intrinsic rather than extrinsic, as in the constant and chemostat environments.  
397 Unfortunately, there are no empirical studies comparing the benefits of aging versus repair in  
398 biofilms, highlighting the dearth of studies of aging in the most common habitat of  
399 microorganisms.

400

401 The evolved extent to which unicells segregate damage asymmetrically varies substantially  
402 between species. This poses the question of whether this is due to differences in the  
403 mechanism of cell growth and division, differences in the 'life span' of their habitats or the  
404 degree to which these 'unicells' are actually multicellular with a clearer division of labor

405 between germline and soma. The budding yeast, *Saccharomyces cerevisiae*, was the first  
406 unicell shown to age (21) and, in fact, is the only unicell for which the evidence of aging under  
407 benign conditions, rather than as a stress response, remains strong (9, 20, 32–38, 74–77). Its  
408 habitat is very rich in sugars but short-lived (78), and we argued previously (46) that investing  
409 resources into repairing the cell rather than reproduction is less advantageous when the  
410 habitat is (reliably) transient. However, the fission yeast *Schizosaccharomyces pombe* lives in  
411 the same kind of habitat (79). Also, the bacterium *Caulobacter crescentus* lives attached to  
412 surfaces that are decaying or consumed by zooplankton and therefore similarly transient, yet  
413 the evidence for senescence in *C. crescentus* has dwindled since our 2014 publication (9, 34,  
414 80). This suggests that our previously proposed explanation – that morphologically  
415 asymmetric cell division and high external mortality due to short-lived habitats are necessary  
416 and sufficient conditions to see aging in unicells – needs to be revised as these conditions  
417 appear necessary but not sufficient. A third condition, nascent multicellularity, needs to be  
418 also met, see below.

419

420 Recent studies of the fission yeast, following single cells for many generations, provide clear  
421 evidence that asymmetric damage segregation does not occur under benign conditions.  
422 Instead, it appears to be a stress response to deal with misfolded proteins, which aggregate  
423 and then fuse into fewer and larger aggregates, facilitating the segregation of the damage into  
424 one aged daughter cell with a reduced growth rate and higher mortality (32, 33, 81). Spivey *et al.*  
425 (2017) (37) found that cell death in the fission yeast was actually not preceded by the  
426 characteristics of aging. Nakaoka & Wakamoto (2017) (38) also found no increase of mortality  
427 with age, instead, they found mortality to increase with growth rate. Moreover, they found  
428 that aggregates can get lost from old pole cells during division so they can rejuvenate.



429 Remarkably, oxidative stress reduced growth rate only transiently and protein aggregates  
430 present in the cell after stress did not affect growth. Apart from fission yeast, a recent study  
431 of *C. crescentus* by Iyer-Biswas *et al.* (2014) (34) found a trend of decreasing fecundity over  
432 generations only at 37°C, the highest temperature used. This could be considered a heat shock  
433 given typical lake temperatures where *C. crescentus* lives. Moreover, Schramm *et al.* (2019)  
434 (9) found no evidence for asymmetric segregation of protein aggregates, despite the  
435 morphologically asymmetric cell division in *C. crescentus*. In *E. coli*, the extent to which a cell  
436 segregates damage asymmetrically at division tends to increase with the severity of  
437 environmental stress that cells are exposed to (36). In *Mycobacterium tuberculosis*,  
438 segregation is critical for recovery from stress that resulted in damaged protein that cannot  
439 be repaired (35). An entirely different issue is survival during starvation, where aging has  
440 recently been proposed as an adaptive strategy based on the finding that starving *E. coli* cells,  
441 like non-starving humans, follow the Gompertz law of mortality (82). However, the Gompertz  
442 law has been shown to arise from a variety of processes, including tumor growth, growth of  
443 batch cultures and genetic or acquired susceptibilities to death (83–88), so no mechanistic  
444 conclusions can be drawn from finding that mortality follows the phenomenological Gompertz  
445 law.

446  
447 Considering all evidence, the budding yeast appears to be the only studied ‘unicell’ where  
448 aging occurs in the absence of stress. However, neither its asymmetric cell division mechanism  
449 of budding, nor living in transient habitats, is sufficient to explain this difference. It seems to  
450 us that the common view of the budding yeast as a unicell may be mistaken and the missing  
451 ultimate reason why budding yeast ages is that it is, to some extent, a multicellular organism.  
452 First, the monophyletic yeast lineage (*Saccharomycotina*) is a branch of the *Ascomycota*, a

453 division of fungi that have many mycelial forms with multicellular hyphae, so yeasts have a  
454 multicellular heritage (89). Second, yeast can easily evolve towards multicellularity when  
455 cluster formation is selected (30, 31). Third, while many lab strains are mutants in a gene  
456 required for filamentous growth, which would hamper genetic analysis, wild strains of yeast  
457 are dimorphic with a unicellular yeast and a pseudohyphal multicellular form under starvation  
458 (29). Thus, the ‘unicellular’ yeast is at the cusp of multicellularity. We propose that the  
459 combination of the budding mechanism of asymmetric growth and division, dispersal  
460 between transient habitats and nascent multicellularity are the ultimate reasons that the  
461 budding yeast is the exception that evolved aging as part of the normal life cycle rather than  
462 as a stress response.

463

464 Our study has several limitations. First, we have focused on the effect of damage on growth  
465 rate rather than mortality. This is partly for simplicity and partly because some studies show  
466 an increase of mortality with age (90) while others suggest mortality is random rather than  
467 increasing with age (37, 38, 79). Second, we neglect damage that had not been repaired before  
468 it became segregated or that would be prohibitively expensive to repair, since the work of Lin  
469 Chao’s group has covered this well. They showed that damage segregation under constant  
470 environmental conditions leads to separate steady state levels of damage in old and young  
471 lineage cells, meaning that growth rate and mortality of cells do not change over divisions (43,  
472 44, 91–94). (Since there is no trend of deterioration and the replication of young and old  
473 lineages do not fit a soma germline distinction, it is probably better to refer to this as damage  
474 homeostasis rather than aging). Third, we avoided specific assumptions on mechanisms of  
475 damage repair or segregation that are organism specific as these are subject to evolution and  
476 our interest is the evolution of general strategies. Fourth, we have simplified the biofilm

477 system to growth on flat, inert surfaces without detachment. While our rough, finger like  
478 biofilms capture typical aspects of biofilm structure, many processes and potential structures  
479 could not be covered in this study as the number of possible combinations is huge.  
480 Nonetheless, our study is the first to cover the extremes, from a perfectly mixed chemostat  
481 to a simple biofilm without any mixing (no motility of cells and only diffusive transport of  
482 substrate through boundary layer and biofilm). That the results were, surprisingly, essentially  
483 the same for both extremes, suggests that the findings hold for environments in between  
484 these extremes.

485  
486 In conclusion, our model predictions are confirmed by the experimental literature showing  
487 that aging provides fitness advantages only if the following necessary and sufficient conditions  
488 are met in combination for a given organism: (i) presence of a cell division mechanism that  
489 clearly enables asymmetric division of all damage such as budding; (ii) predominant habitat is  
490 transient or the extrinsic mortality high for other reasons, favoring early reproduction; and  
491 (iii) a degree of multicellularity is present. Otherwise, aging is advantageous only as a stress  
492 response to deal with damage that failed to be repaired. Here, we have expanded the scope  
493 of this prediction substantially from previous work in constant and dynamic but spatially  
494 uniform environments by exploring biofilms as an exemplar of spatially structured systems  
495 thought to harbor the majority of microbes in the environment. In contrast to our original  
496 hypothesis, we found that repair is also better than damage segregation in biofilms.

497 **MATERIALS AND METHODS**

498 We are following the standard ODD (Overview, Design concepts, and Details) protocol for  
499 describing individual-based models to facilitate comparison and review (Grimm *et al.*, 2006,  
500 2010).

501

502 **Purpose**

503 The purpose of this study is to determine whether segregation or repair of damage is the  
504 optimal unicellular strategy for dealing with cellular damage in spatially structured systems  
505 such as biofilms. In order to do this, we expand upon our previous work in spatially uniform  
506 systems (constant and chemostat environments), Clegg *et al.* (2014) (46) by introducing a  
507 strategy for adaptive damage repair and further subdividing biomass into four rather than two  
508 components. All simulations described here were performed using the free and open-source  
509 modelling platform iDynoMiCS (individual-based Dynamics of Microbial Communities  
510 Simulator) (97).

511

512 **State variables and scales**

513 *Growth parameters*

514 Growth parameters (Table 1) used are for *Escherichia coli*, where available, and are the same  
515 as those used by Clegg *et al.* (2014) (46). Note that ‘protein’ is representative of the whole  
516 biomass.

517 TABLE 1 All symbols, variables and parameters used

| Symbol                | Name                                                                                                                                       | Units                                                                           |
|-----------------------|--------------------------------------------------------------------------------------------------------------------------------------------|---------------------------------------------------------------------------------|
| $a$                   | aging (damage accumulation) rate (constant)                                                                                                | $0.1 \text{ h}^{-1}$                                                            |
| $a'$                  | aging rate proportional to net specific growth rate                                                                                        | dimensionless,<br>0.22                                                          |
| $\beta$               | investment in repair as a proportion of the total protein (fixed)                                                                          | dimensionless,<br>0.07                                                          |
| $\hat{\beta}$         | adaptive investment in repair as a proportion of the total protein                                                                         | dimensionless,<br>between 0 and<br>1                                            |
| $\mu_{max}$           | maximum specific growth rate (Koch & Wang, 1982)                                                                                           | $1.2 \text{ h}^{-1}$                                                            |
| $\mu(S)$              | specific growth rate as a function of substrate concentration                                                                              | $\text{h}^{-1}$                                                                 |
| $K_S$                 | Monod (half-saturation) constant (Koch & Wang, 1982)                                                                                       | $0.00234 \text{ g L}^{-1}$                                                      |
| $P_{g,a}$             | protein invested into growth, active                                                                                                       | fg                                                                              |
| $P_{r,a}$             | protein invested into repair, active                                                                                                       | fg                                                                              |
| $P_{g,d}$             | protein invested into growth, damaged                                                                                                      | fg                                                                              |
| $P_{r,d}$             | protein invested into repair, damaged                                                                                                      | fg                                                                              |
| $P_{act}$             | active protein ( $P_{g,a} + P_{r,a}$ )                                                                                                     | fg                                                                              |
| $P_{dam}$             | damaged protein ( $P_{g,d} + P_{r,d}$ )                                                                                                    | fg                                                                              |
| $P_{gro}$             | protein invested into growth ( $P_{g,a} + P_{g,d}$ )                                                                                       | fg                                                                              |
| $P_{rep}$             | protein invested into repair ( $P_{r,a} + P_{r,d}$ )                                                                                       | fg                                                                              |
| $P_{tot}$             | total protein ( $P_{g,a} + P_{r,a} + P_{g,d} + P_{r,d} = P_{act} + P_{dam}$ )                                                              | fg                                                                              |
| $P_{div}$             | threshold protein mass triggering division (46)                                                                                            | 620 fg (dry<br>mass)                                                            |
| $Z$                   | cellular age, or damaged protein as a proportion of total protein<br>$\left(\frac{P_{dam}}{P_{tot}}\right)$                                | dimensionless,<br>between 0 and<br>1                                            |
| $\alpha$              | degree of asymmetry, or damage segregation                                                                                                 | dimensionless,<br>between 0 (fully<br>symmetric) and<br>1 (fully<br>asymmetric) |
| $\theta$              | baby mass fraction; proportion of protein inherited by the new pole cell (normally distributed with mean 0.5 and standard deviation 0.025) | dimensionless,<br>between 0 and<br>1                                            |
| $Y_\mu$               | growth yield, the efficiency of converting glucose to active protein (Neijssel <i>et al.</i> , 1996)                                       | $0.444 \text{ g g}^{-1}$                                                        |
| $Y_r$                 | repair yield, the efficiency of converting damaged protein to active protein (46)                                                          | $0.8 \text{ g g}^{-1}$<br>(assumed)                                             |
| $r(P_{act}, P_{dam})$ | rate of repair                                                                                                                             | $\text{h}^{-1}$                                                                 |
| $S$                   | substrate concentration                                                                                                                    | $\text{g L}^{-1}$                                                               |
| $S_{in}$              | substrate concentration in the inflow (46) (used in the constant and chemostat environments)                                               | 0.00234<br>(constant) or                                                        |

|            |                                                                                                                                                         |                                                                                  |
|------------|---------------------------------------------------------------------------------------------------------------------------------------------------------|----------------------------------------------------------------------------------|
|            |                                                                                                                                                         | 0.00324<br>(chemostat) g L <sup>-1</sup>                                         |
| $S_{bulk}$ | substrate concentration in the bulk liquid (used in the biofilm environment)                                                                            | 0.014222, 0.000889 or 0.003556 g L <sup>-1</sup>                                 |
| $D$        | dilution rate (46)                                                                                                                                      | 0.3 (chemostat) or 0.6 (biofilm bulk liquid) h <sup>-1</sup>                     |
| $\rho$     | biomass density (dry mass); assumed to be lower in biofilms due to the presence of extracellular polymeric substances (EPS).                            | 290 (constant and chemostat; (100)) or 201 (biofilm) g L <sup>-1</sup> (assumed) |
| $b_L$      | boundary layer thickness (unless otherwise stated)                                                                                                      | 48 $\mu\text{m}$ (assumed)                                                       |
| $\delta^2$ | ratio of maximum substrate transport to maximum substrate consumption rate                                                                              | dimensionless, 0.0017, 0.0069 or 0.028 (assumed)                                 |
| $\sigma_f$ | absolute deviation of biofilm front points from the mean front position; a measure of biofilm roughness                                                 | $\mu\text{m}$                                                                    |
| $h_{max}$  | maximum biofilm thickness (unless otherwise stated), above which cells would be removed (here, the simulation was stopped when this height was reached) | 154 $\mu\text{m}$ (assumed)                                                      |
| $D_G$      | diffusivity of growth substrate (glucose)                                                                                                               | $6.7 \times 10^{-10} \text{ m}^2 \text{ s}^{-1}$ (101)                           |
| $S_f$      | shove factor (102)                                                                                                                                      | 1.10 (assumed)                                                                   |

518

519 *Environments*

520 Three environments were used for this study: constant, chemostat and biofilm.

521 *Constant environment:* Substrate concentration is kept constant and population size is kept to  
522 1,000 as new cells randomly replace existing cells.

523 *Chemostat environment:* The simulation domain behaves like a chemostat of size 1  $\mu\text{m}^3$ . A  
524 chemostat is a well-mixed system where fresh resources constantly flow in and cells and left-  
525 over resources constantly flow out, at the same dilution rate  $D$  (0.3 h<sup>-1</sup>; Table 1).

526 *Biofilm environment:* Only two dimensional simulations were used, to simplify analysis,  
527 however, the addition of a third dimension would not be expected to change results because  
528 both horizontal dimensions are equivalent (68). The domain size is (256 x 256)  $\mu\text{m}^2$ , and the  
529 spatial grid for solving the diffusion reaction equation has a resolution of (4 x 4)  $\mu\text{m}^2$ . The  
530 glucose concentration in the bulk liquid connected to the biofilm domain is kept constant  
531 throughout.

532

### 533 *Length of time simulated*

534 Constant and chemostat environment simulations were run for a maximum length of 500  
535 days. Single species simulations were run for 500 days, and competition simulations were  
536 stopped earlier if only one species remained in the simulation domain. Some single-species,  
537 single-cell simulations were run for only three days when the purpose was to follow one old  
538 pole cell over sufficient generations. Biofilm simulations were run until a maximum biofilm  
539 height of 154  $\mu\text{m}$  was reached.

540

### 541 Process overview and scheduling

#### 542 *Growth, aging and repair*

543 Cell growth is exponential, as growth rate is proportional to the current mass of the cell (but  
544 see about age dependence below). Cells divide once their total protein threshold,  $P_{div}$  (Table  
545 1), is reached (randomized by drawing from a normal distribution with given mean  $\pm$  standard  
546 deviation;  $0.5 \pm 0.025$ ). Cells are made of two types of biomass, referred to as protein: protein  
547 invested into growth machinery, or protein invested into repair machinery, and protein may  
548 be either active or damaged (Table 1). As cells grow, they make active protein that is invested  
549 into growth. Active protein is damaged in one of two ways: at a constant rate ( $a$ ), as in our

550 previous work (46), or at a rate that is proportional to the cellular specific growth rate ( $a'$ ). If  
551 cells possess the ability to carry out repair, damaged protein is converted back to active  
552 protein, at a rate proportional to both the concentration of damaged protein and the  
553 concentration of active repair protein with rate constant  $\beta$ , but with an efficiency, or repair  
554 yield ( $Y_r$ ), of 80% (these processes are summarized in Fig. 1).

555 Individuals can differ in their strategy for dealing with cellular damage, but strategies are  
556 inherited and do not evolve. There are two cell division strategies: cells either divide  
557 symmetrically or asymmetrically. Here we only look at complete symmetry or asymmetry as  
558 partial asymmetry always gave intermediate results in our previous study (46). In an  
559 asymmetrically dividing cell, the 'old pole' daughter cell inherits all damage (up to capacity),  
560 while the 'new pole' daughter cell inherits none and is therefore rejuvenated. There are three  
561 repair strategies: (i) No repair; (ii) Investing into repair machinery at a fixed fraction ( $\beta$ ) of  
562 newly formed biomass. The optimal fixed fraction of investment as a function of damage  
563 accumulation rate was previously determined for chemostats (46); and (iii) Adaptive  
564 investment into repair machinery ( $\hat{\beta}$ ) depending upon the current levels of damage within the  
565 cell. This adaptive repair strategy is new to studies that model aging and repair in unicells and  
566 was developed to account for the different specific growth rates of cells in a biofilm, which  
567 change in time and space. Altogether, there were six combinations of division and repair  
568 strategies used in this study (Fig. 1). All six combinations of division and repair strategies were  
569 used for initial, single-strategy investigations (*i.e.* Fig. 2), but only FR, AR and DS were used for  
570 competitions.

571



572 *Mortality (intrinsic and extrinsic)*

573 In all environments, cells may be considered dead when their age reaches 1, signifying that  
574 there is no longer any active protein within the cell (intrinsic mortality). Such ‘dead’ cells are  
575 assumed to remain physically intact and to continue to occupy space (only relevant for  
576 biofilms) since cell wall degradation is presumably a slow process (taking many residence  
577 times in the chemostat and longer than the times we simulate in biofilms).

578 *Constant environment:* a cell is removed at random each time a division occurs (extrinsic  
579 mortality).

580 *Chemostat environment:* cells are removed randomly with the outflow from the chemostat at  
581 the dilution rate (extrinsic mortality).

582 *Biofilm environment:* cells are not removed from the simulation for reasons given in the fitness  
583 section (no extrinsic mortality). Rather than removing the cells when the maximum biofilm  
584 height is reached (simulating detachment), we stop the simulation.

585

586 *Biofilm structure*

587 The formation of biofilm structure was investigated in the absence of aging and repair in order  
588 to find conditions that would give typical biofilm structures, *e.g.* a smooth, an intermediate  
589 and a rough biofilm. Earlier models have found that rougher and more finger-like biofilms tend  
590 to be produced when nutrient availability is limiting growth (Picioreanu *et al.*, 1998; Dockery  
591 and Klapper, 2002; Olivera-Nappa *et al.*, 2010). This can be achieved, *e.g.*, by reducing the  
592 substrate concentration in the bulk liquid  $S_{bulk}$  or increasing the thickness of the boundary  
593 layer  $b_L$ , which both have a direct effect on the flux with which substrate diffuses into the  
594 biofilm, and therefore on the thickness of the actively growing layer (65). Dimensionless  
595 groups have previously been introduced to explain the combined effects of  $S_{bulk}$  and  $b_L$  and

596 other parameters on biofilm structure (see the Supplementary Materials and Methods section  
597 for further explanation of these). Here we use:

598 
$$\delta^2 = \frac{S_{bulk} D_G Y_\mu}{\mu_{max} \rho b_L^2}$$

599 where  $D_G$  is the diffusion coefficient of the growth substrate,  $Y_\mu$  is the growth yield,  $\mu_{max}$  is  
600 the maximal specific growth rate and  $\rho$  is the biomass density. In order to obtain biofilm  
601 structures that were smooth, intermediate or rough,  $b_L$  was kept constant at 48  $\mu\text{m}$  and  $S_{bulk}$   
602 took three different values (in  $\text{g L}^{-1}$ ): 0.014222 (smooth,  $\delta^2 = 0.028$ ), 0.003556 (intermediate,  
603  $\delta^2 = 0.0069$ ), and 0.000889 (rough,  $\delta^2 = 0.0017$ ).

604

605 *Time*

606 Time is discrete. Since diffusion and biochemical reactions are on a faster timescale than  
607 growth and cell division, the diffusion-reaction equation is solved while the biomass  
608 distribution is fixed. Once the substrate concentration field is updated, it is kept fixed while  
609 the agents are stepped so they can grow and divide. Both diffusion-reaction and agent time  
610 steps were set to be the same at  $0.01 \text{ h}^{-1}$  in constant and chemostat environments, and  $0.05$   
611  $\text{h}^{-1}$  in biofilm environments where rates are lower.

612

613 *Event scheduling*

614 The simulation is entirely time stepped rather than event driven. The order in which agents  
615 are called in each time step is randomized.

616

617 Design concepts

618 *Adaptation*

619 Within this model, only those cells with the adaptive repair mechanism are able to adapt to  
620 their environment. These cells are able to sense their current cellular damage levels and invest  
621 into producing repair protein appropriately. Repair protein is assumed to be stable rather than  
622 turned over. In other words, repair protein is not converted back into growth protein if it is no  
623 longer needed.

624

625 *Fitness*

626 Fitness is an emergent property and not defined by a fitness function. In constant and  
627 chemostat environments, the fittest strategy is determined by competition as the only  
628 strategy remaining in the simulation domain. In biofilm simulations, the fittest strategy was  
629 determined by comparing population sizes, growth rates, and the log biomass ratio between  
630 the strategies. We have avoided detachment in these biofilm simulations as a metacommunity  
631 model would be required to simulate fitness as an emergent property when cells detach from  
632 a biofilm patch as other patches would need to be present for colonization by cells detached  
633 from the focal patch.

634

635 *Observation*

636 Data is written to xml files at user-defined intervals. This data includes the state of the  
637 environment, such as solute concentration fields, summary data on the population (*e.g.*,  
638 number of cells born or removed at each time step), as well as lists of individual cells with all  
639 of their properties, such as position, size, growth rate and investment into each protein type.

640 Since the entire state of all agents and the environment is saved, simulations can be restarted  
641 with this output.

642

643 **Initialization**

644 *Environment*

645 For the constant and chemostat environments, simulations are initiated with 1,000 cells (500  
646 per strategy). Biofilm simulations are initiated with 4, 8, 16 or 32 cells (2, 4, 8 or 16,  
647 respectively, of each strategy), which are placed randomly on the substratum surface.

648

649 **Input**

650 Almost all system and agent parameters are specified in an xml input file called 'protocol' file.

651 Example input files can be found at [https://github.com/R-Wright-1/iDynoMiCS\\_1.5](https://github.com/R-Wright-1/iDynoMiCS_1.5).

652

653 **Sub-models**

654 *Mathematical skeleton*

655 The following equations are for modeling growth, aging, and repair of individual cells. They  
656 are ordinary differential equations (ODEs). Their solution depends on conditions prescribed at  
657 one end of the interval of interest (Lick, 1989).

658

659 *Individual Model Equations*

660 The population is not modelled directly, but summary statistics are gathered and rates  
661 summed over all individuals. The substrate consumption rates of all individuals are gathered  
662 and summed and this total rate of substrate consumption enters the standard equation for

663 chemostat substrate dynamics (+ inflow – outflow – consumption). Note that the net specific  
664 growth rate of an individual is also the sum of the rates of change for all four components of  
665 the cell. We give the differential equations for the change of the cell's components below.  
666 Individuals do not have access to population level information and their behavior depends  
667 only on local conditions.  
668 The biofilm environment consists of substrate concentration fields and a representation of  
669 the current biofilm structure (substratum surface, biofilm, biofilm boundary-layer interface  
670 and boundary-layer bulk-liquid interface). The environment is modelled as a continuum using  
671 partial differential equations (PDEs) to describe the diffusion of substrate and rates of  
672 substrate uptake (or product secretion) by the cells. For this purpose, the distributions of  
673 cellular masses and substrate consumption (reaction) rates are mapped to the grid used for  
674 solving the PDEs. The reaction diffusion PDEs are solved with a multigrid algorithm, see Lardon  
675 *et al.* (2011) (97) for more details.

676 Since adaptive repair has a variable fraction of repair machinery, the previously used  $P_{act}$  and  
677  $P_{dam}$  have each to be split into two fractions:

678  $P_{g,a}$ ,  $P_{r,a}$ ,  $P_{g,d}$  and  $P_{r,d}$ , referring to growth machinery, active; repair machinery,  
679 active; growth machinery, damaged; and repair machinery, damaged, respectively  
680 (as in Table 1).

681 Thus, the total 'protein' of the cell (representing all biomass) is  $P_{tot} = P_{g,d} + P_{r,d} + P_{g,a} +$   
682  $P_{r,a}$ .

683 We assume that damage is always toxic, *i.e.*, specific growth rate, due to some inhibitory effect  
684 of damaged material, decreases with the fraction of damaged protein,  $Z$ , equivalent to the  
685 age of the cell:

686 
$$Z = \frac{P_{g,d} + P_{r,d}}{P_{tot}}$$

687 Toxic damage led to more pronounced differences between the strategies in our previous  
 688 study, whilst not changing the fitness ranking of strategies apart from one case, at the lowest  
 689 damage accumulation rate and only in the constant environment, where the differences  
 690 between strategies were minute (46).

691 In cells of all strategies, growth of active protein depends on substrate concentration  $S$   
 692 following Monod kinetics:

693 
$$\mu(S) = \frac{\mu_{max} S}{K_S + S} \quad (1)$$

694 Where repair of damage takes place, the rate of repair is Michaelis-Menten like and  
 695 proportional to damaged protein and active repair protein (see Clegg *et al.* (2014) (46) for  
 696 further explanations):

697 
$$r(P_{act}, P_{dam}) = \frac{\tilde{\beta} P_{act} P_{dam}}{\tilde{\beta} P_{act} + P_{dam}} \quad (2)$$

698 where  $\tilde{\beta} P_{act}$  represents the proportion of active biomass that is dedicated to repairing  
 699 damaged biomass and a placeholder for the value actually used depending on the repair  
 700 strategy. For fixed repair, it becomes the fixed fraction  $\beta$  of active protein  $P_{act}$  that is repair  
 701 machinery  $\tilde{\beta} P_{act} = \beta P_{act}$ . For adaptive repair, it is replaced by the currently active repair  
 702 machinery  $\tilde{\beta} P_{act} = P_{r,a}$ , which is produced as a fraction of growth  $\hat{\beta}$  calculated for each  
 703 individual at every time step depending on its current fraction of damage (age  $Z$ ) from the  
 704 following equation:

705 
$$\hat{\beta} = \left( \frac{Z}{1-Z} \right) \max \left( \pm \sqrt{\frac{Y_r}{\mu(S)} \frac{1}{1-Z}} - 1 \right) \quad (3)$$

706 which is the value of  $\beta$  that maximizes the rate of active protein production and is derived  
 707 from  $\frac{d(dP_{act}/dt)}{d\beta} = 0$ .

708 For  $\mu(S)$  in eq. 3, we do not take the gross specific growth rate according to eq. (1), but the  
 709 net specific growth rate each individual cell calculates from its change of total mass from one  
 710 iteration to the next, which due to inefficient repair could be less.

711 This gives the following differential equations for the four components of each individual cell  
 712 for the case of toxic damage that is being repaired:

$$713 \quad \frac{d}{dt} P_{g,a} = (1 - \tilde{\beta}) \mu(S) P_{g,a} (1 - Z) - A P_{g,a} + Y_r P_{r,a} \frac{P_{g,d}}{P_{r,a} + P_{r,d}} \quad (4a)$$

$$714 \quad \frac{d}{dt} P_{r,a} = \tilde{\beta} \mu(S) P_{g,a} (1 - Z) - A P_{r,a} + Y_r P_{r,a} \frac{P_{r,d}}{P_{r,a} + P_{r,d}} \quad (4b)$$

$$715 \quad \frac{d}{dt} P_{g,d} = A P_{g,a} - P_{r,a} \frac{P_{g,d}}{P_{r,a} + P_{r,d}} \quad (4c)$$

$$716 \quad \frac{d}{dt} P_{r,d} = A P_{r,a} - P_{r,a} \frac{P_{r,d}}{P_{r,a} + P_{r,d}} \quad (4d)$$

717 where  $A$  is a placeholder for the use of constant ( $a$ ) or net specific growth rate proportional  
 718 aging rate ( $a'$ ):

$$719 \quad a(\mu) = a' \frac{(dP_{tot}/dt)}{P_{tot}}$$

#### 720 *Cell division*

721 Upon cell division, the post-division protein masses of the old pole cell are:

$$722 \quad P_{a,g} = (1 - \theta) P'_{a,g} - \alpha \theta P'_{d,g} \quad (5a)$$

$$723 \quad P_{a,r} = (1 - \theta) P'_{a,r} - \alpha \theta P'_{d,r} \quad (5b)$$

$$724 \quad P_{d,g} = (1 - \theta) P'_{d,g} + \alpha \theta P'_{d,g} \quad (5c)$$

$$725 \quad P_{d,r} = (1 - \theta) P'_{d,r} + \alpha \theta P'_{d,r} \quad (5d)$$

726 and those of the new pole cell are:

$$727 \quad P_{a,g} = \theta P'_{a,g} + \alpha \theta P'_{d,g} \quad (6a)$$

$$728 \quad P_{a,r} = \theta P'_{a,r} + \alpha \theta P'_{d,r} \quad (6b)$$

$$729 \quad P_{d,g} = \theta P'_{d,g} - \alpha \theta P'_{d,g} \quad (6c)$$

$$730 \quad P_{d,r} = \theta P'_{d,r} - \alpha \theta P'_{d,r} \quad (6d)$$

731 where the prime indicates the protein amounts in the pre-division cell,  $\theta$  the proportion of  
732 protein inherited by the new pole cell and  $\alpha$  the asymmetry of cell division ( $\alpha = 1$  fully  
733 asymmetric division,  $\alpha = 0$  fully symmetric division). However, if there is more damage than  
734 the old pole daughter cell can take (when  $(1 - \theta)P'_{a,g} < \alpha \theta P'_{d,g}$  or  $(1 - \theta)P'_{a,r} < \alpha \theta P'_{d,r}$   
735 so the old pole-cell would inherit a negative quantity of active protein following eq. 5), the old  
736 pole cell is assumed to be filled with damaged protein:

$$737 \quad P_{a,g} = 0 \quad (7a)$$

$$738 \quad P_{a,r} = 0 \quad (7b)$$

$$739 \quad P_{d,g} = (1 - \theta)(P'_{a,g} + P'_{d,g}) \quad (7c)$$

$$740 \quad P_{d,r} = (1 - \theta)(P'_{a,r} + P'_{d,r}) \quad (7d)$$

741 and the new pole cell inherits all of the active protein, plus the remainder of the damaged  
742 protein:

$$743 \quad P_{a,g} = P'_{a,g} \quad (8a)$$

$$744 \quad P_{a,r} = P'_{a,r} \quad (8b)$$

$$745 \quad P_{d,g} = \theta P'_{d,g} - (1 - \theta)P'_{a,g} \quad (8c)$$

$$746 \quad P_{d,r} = \theta P'_{d,r} - (1 - \theta)P'_{a,r} \quad (8d)$$

747

#### 748 *Aging*

749 The growth independent aging rate of  $0.1 \text{ h}^{-1}$ , used in Clegg *et al.* (2014), was suitable for  
750 constant and chemostat (spatially uniform steady state) environments, but was not suitable  
751 for biofilm (spatially structured) environments. Most cells within biofilms are not actively  
752 growing. Only those cells in the top or active layer of biofilms have access to substrate and are  
753 actively growing. It therefore makes sense to assume that non-growing cells that do not



754 produce proteins or respire do not accumulate damage (19, 71, 72). Thus, the damage  
755 accumulation rate was assumed to be proportional to cellular specific growth rate.  
756 In order to compare strategies across environments, we need to apply the same damage  
757 accumulation rate in all three environments. Hence, the new damage accumulation rate that  
758 is proportional to specific growth rate,  $a'$ , must be calculated to match the fixed damage  
759 accumulation rate in the spatially uniform environments ( $a = 0.1 \text{ h}^{-1}$ ) where the specific  
760 growth rate is constant or predictable for a steady state. In the steady state of the chemostat,  
761 the net specific growth rate,  $\mu_N$ , is equal to the dilution rate,  $D$ , which was set to  $0.3 \text{ h}^{-1}$ . In  
762 iDynoMiCS, the gross specific growth rate,  $\mu_G$ , is calculated with the Monod equation and  
763 depends on substrate concentration,  $S$ . However, how much the net specific growth rate is  
764 lower than the gross specific growth rate depends on the age of the cell, its rate of repair and  
765 its current level of investment into repair. It is therefore difficult to work out analytically so  
766 we had to run a number of simulations with different ratios of aging rates to specific growth  
767 rates to find that a value of 0.22 (dimensionless) would match the previously used constant  
768 aging rate for chemostats (Fig. S6).

769

#### 770 *Diagram of processes*

771 A diagram containing a brief overview of all cellular processes is in Fig. 1.

772

#### 773 **iDynoMiCS Simulations**

##### 774 *Cell strategies*

775 Six combinations of damage segregation and repair strategies were used in this study, but only  
776 the fittest three of these were used in biofilm simulations: asymmetric division without repair  
777 (DS), symmetric division with adaptive repair (AR), and symmetric division with fixed repair

778 (FR). They are described in the schematic depicted in Fig. 1. Damage is considered to be toxic  
779 in all simulations as toxic damage leads to greater differences between strategies (46).

780

#### 781 *Comparison with previous fixed repair*

782 In order to compare the new, adaptive repair strategy developed here with the previous fixed  
783 repair (as in (46)), single strategy and competition simulations were run in iDynoMiCS. These  
784 simulations were initiated with 1,000 cells for single strategies or 500 of each strategy for  
785 competitions. The single strategy simulations were run for 3 days in the constant  
786 environment, where the 'old pole' cell was artificially kept in the simulation, rather than  
787 allowing random removal, to examine the consequences of adaptive repair on an individual  
788 cell (Fig. 2). Alternatively, they were run for 500 days, to examine the consequences of  
789 adaptive repair on populations of cells. Competitions between cells of different strategies  
790 were run in both the constant and chemostat environments for a maximum of 500 days, or  
791 until only one strategy remained in the simulation domain ( $n=10$  for each).

792

#### 793 *Biofilm environment simulations*

794 We initially carried out biofilm simulations with a single strategy without aging or repair to  
795 determine the parameters that would give rise to typical biofilm structures. For these, cells  
796 were initially placed evenly on the substratum surface. For all further simulations, with  
797 damage accumulation and repair, cells were initially placed at random on the substratum  
798 surface.

799

800 **Software and hardware used**

801 iDynoMiCS 1.5 is free open source software written in Java (46, 97). Analysis scripts were  
802 written in Python 2.7.10 (Python Software Foundation, 2010). All source and analysis code can  
803 be found at [https://github.com/R-Wright-1/iDynoMiCS\\_1.5](https://github.com/R-Wright-1/iDynoMiCS_1.5).

804

805 Supplemental Material

806 • Supplementary file containing Figures S1-S7, Table S1 and Supplementary Materials  
807 and Methods.

808 • **File S1.** Uploaded to Figshare: <https://doi.org/10.6084/m9.figshare.11520534.v1>.

809 Includes further supplementary figures with biofilm plots for all biofilm simulations  
810 performed.

811

812 REFERENCES

- 813 1. Healy K, Guillerme T, Finlay S, Kane A, Kelly SBA, Mcclean D, Kelly J, Donohue I,  
814 Jackson AL, Cooper N, B PRS, Kelly BA, Kelly DJ. 2014. Ecology and mode-of-life explain  
815 lifespan variation in birds and mammals. *Proc R Soc B* 281.
- 816 2. Jones OR, Scheuerlein A, Salguero-Gómez R, Camarda CG, Schaible R, Casper BB,  
817 Dahlgren JP, Ehrlén J, García MB, Menges ES, Quintana-Ascencio PF, Caswell H,  
818 Baudisch A, Vaupel JW. 2014. Diversity of ageing across the tree of life. *Nature*  
819 505:169–173.
- 820 3. Florea M. 2017. Aging and immortality in unicellular species. *Mech Ageing Dev* 167:5–  
821 15.
- 822 4. Kirkwood TBL, Cremer T. 1982. Cytoogerontology Since 1881: A Reappraisal of August  
823 Weismann and a Review of Modern Progress. *Hum Genet* 60:101–121.
- 824 5. Kirkwood TBL. 2005. Understanding the odd science of aging. *Cell* 120:437–447.
- 825 6. Stewart EJ, Madden R, Paul G, Taddei FF. 2005. Aging and death in an organism that  
826 reproduces by morphologically symmetric division. *PLoS Biol* 3:0295–0300.
- 827 7. Ackermann M, Stearns SC, Jenal U. 2003. Senescence in a bacterium with asymmetric  
828 division. *Science* (80- ) 300:1920.
- 829 8. Iyer-Biswas S, Wright CS, Henry JT, Lo K, Burov S, Lin Y, Crooks GE, Crosson S, Dinner  
830 AR, Scherer NF. 2014. Scaling laws governing stochastic growth and division of single  
831 bacterial cells. *Proc Natl Acad Sci U S A* 111:15912–7.
- 832 9. Schramm FD, Schroeder K, Alvelid J, Testa I, Jonas K. 2019. Growth-driven  
833 displacement of protein aggregates along the cell length ensures partitioning to both  
834 daughter cells in *Caulobacter crescentus*. *Mol Microbiol* 111:1430–1448.
- 835 10. Stewart EJ, Madden R, Paul G, Taddei F. 2005. Aging and death in an organism that  
836 reproduces by morphologically symmetric division. *PLoS Biol* 3:0295–0300.
- 837 11. Lindner AB, Madden R, Demarez A, Stewart EJ, Taddei F. 2008. Asymmetric  
838 segregation of protein aggregates is associated with cellular aging and rejuvenation.  
839 *Proc Natl Acad Sci* 105:3076–3081.
- 840 12. Barker MG, Walmsley RM. 1999. Replicative ageing in the fission yeast  
841 *Schizosaccharomyces pombe*. *Yeast* 15:1511–1518.
- 842 13. Veening J-W, Stewart EJ, Berngruber TW, Taddei F, Kuipers OP, Hamoen LW. 2008.  
843 Bet-hedging and epigenetic inheritance in bacterial cell development. *Proc Natl Acad*  
844 *Sci* 105:4393–4398.
- 845 14. Aldridge BB, Fernandez-Suarez M, Heller D, Ambravaneswaran V, Irimia D, Toner M,  
846 Fortune SM. 2012. Asymmetry and Aging of Mycobacterial Cells Lead to Variable  
847 Growth and Antibiotic Susceptibility. *Science* (80- ) 335:100–104.
- 848 15. Bergmiller T, Ackermann M. 2011. Pole age affects cell size and the timing of cell  
849 division in *Methylobacterium extorquens* AM1. *J Bacteriol* 193:5216–5221.
- 850 16. Laney SR, Olson RJ, Sosik HM. 2012. Diatoms favor their younger daughters. *Limnol*  
851 *Oceanogr* 57:1572–1578.
- 852 17. Humby PL, Snyder ECR, Durnford DG. 2013. Conditional senescence in  
853 *Chlamydomonas reinhardtii* (Chlorophyceae). *J Phycol* 49:389–400.
- 854 18. Damodaran SP, Eberhard S, Boitard L, Rodriguez JG, Wang Y, Bremond N, Baudry J,  
855 Bibette J, Wollman FA. 2015. A millifluidic study of cell-to-cell heterogeneity in  
856 growth-rate and cell-division capability in populations of isogenic cells of  
857 *Chlamydomonas reinhardtii*. *PLoS One* 10:1–28.

- 858 19. Moger-Reischer RZ, Lennon JT. 2019. Microbial ageing and longevity. *Nat Rev*  
859 *Microbiol* 17:679–690.
- 860 20. Wang L, Schubert D, Sawaya MR, Eisenberg D, Riek R. 2010. Multidimensional  
861 structure-activity relationship of a protein in its aggregated states. *Angew Chemie - Int*  
862 *Ed* 49:3904–3908.
- 863 21. Mortimer RK, Johnston JR. 1959. Life Span of Individual Yeast Cells. *Nature* 183:1751–  
864 1752.
- 865 22. Crane MM, Clark IBN, Bakker E, Smith S, Swain PS. 2014. A microfluidic system for  
866 studying ageing and dynamic single-cell responses in budding yeast. *PLoS One* 9:1–10.
- 867 23. Jo MC, Liu W, Gu L, Dang W, Qin L. 2015. High-throughput analysis of yeast replicative  
868 aging using a microfluidic system. *Proc Natl Acad Sci* 112:9364–9369.
- 869 24. Kaya A, Lobanov A V., Gladyshev VN. 2015. Evidence that mutation accumulation does  
870 not cause aging in *Saccharomyces cerevisiae*. *Aging Cell* 14:366–371.
- 871 25. Saarikangas J, Barral Y. 2015. Protein aggregates are associated with replicative aging  
872 without compromising protein quality control. *Elife* 4:1–24.
- 873 26. Paoletti C, Quintin S, Matifas A, Charvin G. 2016. Kinetics of Formation and  
874 Asymmetrical Distribution of Hsp104-Bound Protein Aggregates in Yeast. *Biophys J*  
875 110:1605–1614.
- 876 27. Sarnoski EA, Song R, Ertekin E, Koonce N, Acar M. 2018. Fundamental Characteristics  
877 of Single-Cell Aging in Diploid Yeast. *iScience* 7:96–109.
- 878 28. Yang J, McCormick MA, Zheng J, Xie Z, Tsuchiya M, Tsuchiyama S, El-Samad H, Ouyang  
879 Q, Kaeberlein M, Kennedy BK, Li H. 2015. Systematic analysis of asymmetric  
880 partitioning of yeast proteome between mother and daughter cells reveals “aging  
881 factors” and mechanism of lifespan asymmetry. *Proc Natl Acad Sci U S A* 112:11977–  
882 11982.
- 883 29. Kron SJ. 1997. Filamentous growth in budding yeast. *Trends Microbiol* 5:450–454.
- 884 30. Ratcliff WC, Denison RF, Borrello M, Travisano M. 2012. Experimental evolution of  
885 multicellularity. *Proc Natl Acad Sci* 109:1595–1600.
- 886 31. Ratcliff WC, Fankhauser JD, Rogers DW, Greig D, Travisano M. 2015. Origins of  
887 multicellular evolvability in snowflake yeast. *Nat Commun* 6:1–9.
- 888 32. Coelho M, Dereli A, Haese A, Kühn S, Malinowska L, Desantis ME, Shorter J, Alberti S,  
889 Gross T, Tolić-IM. 2013. Fission yeast does not age under favorable conditions, but  
890 does so after stress. *Curr Biol* 23:1844–1852.
- 891 33. Coelho M, Lade SJ, Alberti S, Gross T, Tolić IM. 2014. Fusion of Protein Aggregates  
892 Facilitates Asymmetric Damage Segregation. *PLoS Biol* 12:1–11.
- 893 34. Iyer-Biswas S, Wright CS, Henry JT, Lo K, Burov S, Lin Y, Crooks GE, Crosson S, Dinner  
894 AR, Scherer NF. 2014. Scaling laws governing stochastic growth and division of single  
895 bacterial cells. *Proc Natl Acad Sci* 111:15912–15917.
- 896 35. Vaubourgeix J, Lin G, Dhar N, Chenouard N, Jiang X, Botella H, Lupoli T, Mariani O,  
897 Yang G, Ouerfelli O, Unser M, Schnappinger D, McKinney J, Nathan C. 2015. Stressed  
898 mycobacteria use the chaperone ClpB to sequester irreversibly oxidized proteins  
899 asymmetrically within and between cells. *Cell Host Microbe* 17:178–190.
- 900 36. Vedel S, Nunns H, Košmrlj A, Semsey S, Trusina A. 2016. Asymmetric Damage  
901 Segregation Constitutes an Emergent Population-Level Stress Response. *Cell Syst*  
902 3:187–198.
- 903 37. Spivey EC, Jones SK, Rybarski JR, Saifuddin FA, Finkelstein IJ. 2017. An aging-  
904 independent replicative lifespan in a symmetrically dividing eukaryote. *Elife* 6:1–25.

- 905 38. Nakaoka H, Wakamoto Y. 2017. Aging, mortality, and the fast growth trade-off of  
906 *Schizosaccharomyces pombe*. *PLoS Biol* 15:1–29.
- 907 39. Watve M, Parab S, Jogdand P, Keni S. 2006. Aging may be a conditional strategic  
908 choice and not an inevitable outcome for bacteria. *Proc Natl Acad Sci U S A*  
909 103:14831–5.
- 910 40. Erjavec N, Cvijovic M, Klipp E, Nystrom T. 2008. Selective benefits of damage  
911 partitioning in unicellular systems and its effects on aging. *Proc Natl Acad Sci*  
912 105:18764–18769.
- 913 41. Rashidi A, Kirkwood TBL, Shanley DP. 2012. *Aging Research in Yeast* 57:315–330.
- 914 42. Medawar PB. 1951. *An Unsolved Problem of Biology*. H. K. Lewis & Co Ltd London.
- 915 43. Chao L. 2010. A model for damage load and its implications for the evolution of  
916 bacterial aging. *PLoS Genet* 6:e1001076.
- 917 44. Proenca AM, Rang CU, Buetz C, Shi C, Chao L. 2018. Age structure landscapes emerge  
918 from the equilibrium between aging and rejuvenation in bacterial populations. *Nat*  
919 *Commun* 9.
- 920 45. Ackermann M, Schauerte A, Stearns SC, Jenal U. 2007. Experimental evolution of  
921 aging in a bacterium. *BMC Evol Biol* 7:1–10.
- 922 46. Clegg RJ, Dyson RJ, Kreft J-U. 2014. Repair rather than segregation of damage is the  
923 optimal unicellular aging strategy. *BMC Biol* 12:52.
- 924 47. Collins S. 2016. Growth rate evolution in improved environments under Prodigal Son  
925 dynamics. *Evol Appl* 9:1179–1188.
- 926 48. Song R, Acar M. 2019. Stochastic modeling of aging cells reveals how damage  
927 accumulation, repair, and cell-division asymmetry affect clonal senescence and  
928 population fitness. *BMC Bioinformatics* 20:1–14.
- 929 49. Costerton JW, Lewandowski Z, Caldwell DE, Korber DR, Lappin-Scott HM. 1995.  
930 *Microbial biofilms*. *Annu Rev Microbiol* 711–745.
- 931 50. Eberl HJ, Parker DF, Van Loosdrecht MCM. 2001. A New Deterministic Spatio-  
932 Temporal Continuum Model for Biofilm Development. *J Theor Med* 3:161–175.
- 933 51. Stewart PS. 2003. Diffusion in Biofilms. *J Bacteriol* 185:1485–1491.
- 934 52. Hall CW, Mah TF. 2017. Molecular mechanisms of biofilm-based antibiotic resistance  
935 and tolerance in pathogenic bacteria. *FEMS Microbiol Rev* 41:276–301.
- 936 53. Flemming H-C, Wingender J, Szewzyk U, Steinberg P, Rice SA, Kjelleberg S. 2016.  
937 *Biofilms: an emergent form of bacterial life*. *Nat Rev Microbiol* 14:563–575.
- 938 54. Hall-Stoodley L, Costerton JW, Stoodley P, State M, Engineering B. 2004. Bacterial  
939 biofilms: from the natural environment to infectious diseases. *Nat Rev Microbiol*  
940 2:95–108.
- 941 55. Dang H, Lovell CR. 2000. Bacterial primary colonization and early succession on  
942 surfaces in marine waters as determined by amplified rRNA gene restriction analysis  
943 and sequence analysis of 16S rRNA genes. *Appl Environ Microbiol* 66:467–475.
- 944 56. Davey ME, O'Toole GA. 2000. Microbial biofilms: from ecology to molecular genetics.  
945 *Microbiol Mol Biol Rev* 64:847–67.
- 946 57. Tolker-Nielsen T, Brinch UC, Ragas PC, Andersen JB, Jacobsen CS, Molin S. 2000.  
947 Development and dynamics of *Pseudomonas* sp. biofilms. *J Bacteriol* 182:6482–6489.
- 948 58. Picioreanu C, Kreft JU, Klausen M, Haagensen JAJ, Tolker-Nielsen T, Molin S. 2007.  
949 Microbial motility involvement in biofilm structure formation - A 3D modelling study.  
950 *Water Sci Technol* 55:337–343.
- 951 59. Ghanbari A, Dehghany J, Schwebbs T, Müssen M, Häussler S, Meyer-Hermann M. 2016.

- 952 Inoculation density and nutrient level determine the formation of mushroom-shaped  
953 structures in *Pseudomonas aeruginosa* biofilms. *Sci Rep* 6:1–12.
- 954 60. Nadell CD, Drescher K, Foster KR. 2016. Spatial structure, cooperation and  
955 competition in biofilms. *Nat Rev Microbiol* 14:589–600.
- 956 61. Kirkwood TBL. 2005. Asymmetry and the origins of ageing. *Mech Ageing Dev* 126:533–  
957 534.
- 958 62. Christiano R, Nagaraj N, Fröhlich F, Walther TC. 2014. Global Proteome Turnover  
959 Analyses of the Yeasts *S.cerevisiae* and *S.pombe*. *Cell Rep* 9:1959–1966.
- 960 63. Picioreanu C, van Loosdrecht M, Heijnen J. 1998. Mathematical Modeling of Biofilm  
961 Strucutre with a Hybrid Differential-Discrete Cellular Automata Approach. *Biotechnol*  
962 *Bioeng* 58:101–116.
- 963 64. Dockery J, Klapper I. 2002. Finger Formation in Biofilm Layers. *Siam J Appl Math*  
964 62:853–869.
- 965 65. Nadell CD, Foster KR, Xavier JB. 2010. Emergence of spatial structure in cell groups  
966 and the evolution of cooperation. *PLoS Comput Biol* 6.
- 967 66. Alpkvist E, Klapper I. 2007. Description of mechanical response including detachment  
968 using a novel particle model of biofilm/flow interaction. *Water Sci Technol* 55:265–  
969 273.
- 970 67. Kreft JU, Picioreanu C, Wimpenny JW, van Loosdrecht MC. 2001. Individual-based  
971 modelling of biofilms. *Microbiology* 147:2897–912.
- 972 68. Picioreanu C, Kreft J, Van MCM, Loosdrecht MCM Van. 2004. Particle-Based  
973 Multidimensional Multispecies Biofilm Model Particle-Based Multidimensional  
974 Multispecies Biofilm Model. *Appl Environ Microbiol* 70:3024–3040.
- 975 69. Picioreanu C, Blauert F, Horn H, Wagner M. 2018. Determination of mechanical  
976 properties of biofilms by modelling the deformation measured using optical  
977 coherence tomography. *Water Res* 145:588–598.
- 978 70. So M, Terashima M, Goel R, Yasui H. 2015. Modelling the Effect of Biofilm Morphology  
979 on Detachment. *J Water Environ Technol* 13:49–62.
- 980 71. Gladyshev VN. 2014. The free radical theory of aging is dead. Long live the damage  
981 theory! *Antioxidants Redox Signal* 20:727–731.
- 982 72. Ogrodnik M, Salmonowicz H, Gladyshev VN. 2019. Integrating cellular senescence  
983 with the concept of damage accumulation in aging: Relevance for clearance of  
984 senescent cells. *Aging Cell* 18:1–21.
- 985 73. Lee WS, Monaghan P, Metcalfe NB. 2013. Experimental demonstration of the growth  
986 rate-lifespan trade-off. *Proc R Soc B Biol Sci* 280.
- 987 74. Zhou C, Li R, Kennedy BK. 2014. Life history: Mother-specific proteins that promote  
988 aging. *Curr Biol* 24:R1162–R1164.
- 989 75. Zhou C, Slaughter BD, Unruh JR, Guo F, Yu Z, Mickey K, Narkar A, Ross RT, McClain M,  
990 Li R. 2014. Organelle-based aggregation and retention of damaged proteins in  
991 asymmetrically dividing cells. *Cell* 159:530–542.
- 992 76. Coelho M. 2015. Aging and stress The role of the environment in cellular replication.  
993 *Longevity* 4–7.
- 994 77. Thayer NH, Leverich CK, Fitzgibbon MP, Nelson ZW, Henderson KA, Gafken PR, Hsu JJ,  
995 Gottschling DE. 2014. Identification of long-lived proteins retained in cells undergoing  
996 repeated asymmetric divisions. *Proc Natl Acad Sci* 111:14019–14026.
- 997 78. Stefanini I, Dapporto L, Legras J-L, Calabretta A, Di Paola M, De Filippo C, Viola R,  
998 Capretti P, Polsinelli M, Turillazzi S, Cavalieri D. 2012. Role of social wasps in



- 999 Saccharomyces cerevisiae ecology and evolution. *Proc Natl Acad Sci* 109:13398–  
1000 13403.
- 1001 79. Coelho M, Dereli A, Haese A, Kühn S, Malinowska L, Desantis ME, Shorter J, Alberti S,  
1002 Gross T, Tolić-Nørrelykke IM. 2013. Fission yeast does not age under favorable  
1003 conditions, but does so after stress. *Curr Biol* 23:1844–1852.
- 1004 80. Wright C, Iyer-Biswas S. 2016. Aging of Individual Cells Over Tens of Generations.  
1005 *Biophys J* 110:144a-145a.
- 1006 81. Lade SJ, Coelho M, Tolić IM, Gross T. 2015. Fusion leads to effective segregation of  
1007 damage during cell division: An analytical treatment. *J Theor Biol* 378:47–55.
- 1008 82. Yang Y, Santos AL, Xu L, Lotton C, Taddei F, Lindner B. 2019. Temporal scaling of  
1009 ageing as an adaptive strategy of *Escherichia coli*.
- 1010 83. Yashin AI, Vaupel JW, Iachine IA. 1994. A duality in aging: the equivalence of mortality  
1011 models based on radically different concepts. *Mech Ageing Dev* 74:1–14.
- 1012 84. Benzekry S, Lamont C, Beheshti A, Tracz A, Ebos JML, Hlatky L, Hahnfeldt P. 2014.  
1013 Classical Mathematical Models for Description and Prediction of Experimental Tumor  
1014 Growth. *PLoS Comput Biol* 10.
- 1015 85. Kogan V, Molodtsov I, Menshikov LI, Reis RJS, Fedichev P. 2015. Stability analysis of a  
1016 model gene network links aging, stress resistance, and negligible senescence. *Sci Rep*  
1017 5:1–12.
- 1018 86. Santra M, Dill KA, De Graff AMR. 2019. Proteostasis collapse is a driver of cell aging  
1019 and death. *Proc Natl Acad Sci U S A* 116:22173–22178.
- 1020 87. Sarapata EA, de Pillis LG. 2013. A Comparison and Catalog of Intrinsic Tumor Growth  
1021 Models. [arXiv:13124857](https://arxiv.org/abs/13124857).
- 1022 88. Zwietering MH, Jongenburger I, Rombouts FM, Riet KV. 1990. Modeling of the  
1023 Bacterial Growth Curve. *Appl Environ Microbiol* 56:1875–1881.
- 1024 89. Paleo-López R, Quintero-Galvis JF, Solano-Iguaran JJ, Sanchez-Salazar AM, Gaitan-  
1025 Espitia JD, Nespolo RF. 2016. A phylogenetic analysis of macroevolutionary patterns in  
1026 fermentative yeasts. *Ecol Evol* 6:3851–3861.
- 1027 90. Wang P, Robert L, Pelletier J, Dang WL, Taddei F, Wright A, Jun S. 2010. Robust growth  
1028 of *Escherichia coli*. *Curr Biol* 20:1099–1103.
- 1029 91. Chao L, Rang CU, Proenca AM, Chao JU. 2016. Asymmetrical Damage Partitioning in  
1030 Bacteria: A Model for the Evolution of Stochasticity, Determinism, and Genetic  
1031 Assimilation. *PLoS Comput Biol* 12:1–17.
- 1032 92. Proenca AM, Rang CU, Qiu A, Shi C, Chao L. 2019. Cell aging preserves cellular  
1033 immortality in the presence of lethal levels of damage. *PLoS Biol* 17:1–21.
- 1034 93. Rang CU, Peng AY, Chao L. 2011. Temporal dynamics of bacterial aging and  
1035 rejuvenation. *Curr Biol* 21:1813–1816.
- 1036 94. Rang CU, Peng AY, Poon AF, Chao L. 2012. Ageing in *Escherichia coli* requires damage  
1037 by an extrinsic agent. *Microbiol (United Kingdom)* 158:1553–1559.
- 1038 95. Grimm V, Berger U, Bastiansen F, Eliassen S, Ginot V, Giske J, Goss-Custard J, Grand T,  
1039 Heinz SK, Huse G, Huth A, Jepsen JU, Jørgensen C, Mooij WM, Müller B, Pe'er G, Piou  
1040 C, Railsback SF, Robbins AM, Robbins MM, Rossmanith E, Rügner N, Strand E, Souissi S,  
1041 Stillman RA, Vabø R, Visser U, DeAngelis DL. 2006. A standard protocol for describing  
1042 individual-based and agent-based models. *Ecol Modell* 198:115–126.
- 1043 96. Grimm V, Berger U, DeAngelis DL, Polhill JG, Giske J, Railsback SF. 2010. The ODD  
1044 protocol: A review and first update. *Ecol Modell* 221:2760–2768.
- 1045 97. Lardon LA, Merkey B V, Martins S, Dötsch A, Picioreanu C, Kreft J-U, Smets BF. 2011.

- 1046 iDynoMiCS: next-generation individual-based modelling of biofilms. *Environ Microbiol*  
1047 13:2416–34.
- 1048 98. Koch A, Wang C. 1982. How close to the theoretical diffusion limit do bacterial uptake  
1049 systems function? *Arch Microbiol* 36–42.
- 1050 99. Neijssel OM, Teixeira De Mattos MJ, Tempest DW. 1996. Growth yield and energy  
1051 distribution. *Escherichia coli Salmonella, Cell Mol Biol by F Niedhart* 2:1683–1693.
- 1052 100. Shuler ML, Leung S, Dick CC. 1979. A Mathematical Model for the Growth of a Single  
1053 Bacterial Cell. *Ann N Y Acad Sci* 326:35–52.
- 1054 101. Goldberg RN, Tewari YB. 1989. Thermodynamic and Transport Properties of  
1055 Carbohydrates and their Monophosphates: The Pentoses and Hexoses. *J Phys Chem*  
1056 *Ref Data* 18:809–880.
- 1057 102. Clegg RJ, Kreft JU. 2017. Reducing discrepancies between 3D and 2D simulations due  
1058 to cell packing density. *J Theor Biol* 423:26–30.
- 1059 103. Olivera-Nappa A, Piciooreanu C, Asenjo JA. 2010. Non-homogeneous biofilm modeling  
1060 applied to bioleaching processes. *Biotechnol Bioeng* 106:660–676.
- 1061 104. Lick WJ. 1989. *Ordinary Differential Equations*. Springer Berlin Heidelberg, Berlin,  
1062 Heidelberg.  
1063
